# Supplementary material for: Synthesis and structures of N-arylcyano-β-diketiminate zinc complexes and adducts and their application in ring‐opening polymerization of l-lactide
Source: Royal Society of Chemistry journal article supplement (doi:10.1039/c4ra16670a), 2015-01-01
Supplement: c4ra16670a1.pdf [file c4ra16670a1.pdf]

# Supporting Information

## Synthesis and Structures of *N*-Arylcyno- $\beta$ -diketiminato Zinc Complexes and Adducts, their Application in Ring-Opening Polymerization of L-lactide

Oleksandra S. Trofymchuk,<sup>a</sup> Constantin G. Daniliuc,<sup>b</sup> Gerald Kehr,<sup>b</sup> Gerhard Erker,<sup>\*b</sup>  
and Rene S. Rojas<sup>\*a</sup>

### Table of contents

|                                                                                                 |    |
|-------------------------------------------------------------------------------------------------|----|
| Synthesis and Characterization of compounds.....                                                | 1  |
| Zn <sub>2</sub> (L <sub>1</sub> ) <sub>2</sub> (OH) <sub>2</sub> ( <b>1</b> <sup>a</sup> )..... | 22 |
| Crystallography Characterization of compounds.....                                              | 23 |
| <sup>1</sup> H NMR spectra of PLLA formation.....                                               | 26 |
| <sup>1</sup> H NMR spectrum of partially dissociated complex <b>2</b> .....                     | 27 |
| <sup>1</sup> H NMR spectrum of PLLA.....                                                        | 27 |
| MALDI-TOF spectrum of PLLA.....                                                                 | 28 |
| PLLA SEC characterization.....                                                                  | 28 |

### 1. Synthesis and Characterization of compounds

#### Preparation of ZnL<sub>1</sub>N(SiMe<sub>3</sub>)<sub>2</sub>, **1**.

Zn{N(SiMe<sub>3</sub>)<sub>2</sub>}<sub>2</sub> (128.9 mg, 278.1  $\mu$ mol) and L<sub>1</sub>H (100 mg, 278.1  $\mu$ mol) were dissolved in toluene and stirred at 80 °C for 12 h. Evaporation of the solvent yielded a pale yellow, air-sensitive solid, that was washed with 3-4 ml cold pentane, and dried *in vacuo*. Yield: 110 mg (188.3  $\mu$ mol, 68 %). Single crystals for X-ray crystallography were grown by layering pentane onto a toluene solution of compound (**1**) at -30 °C.

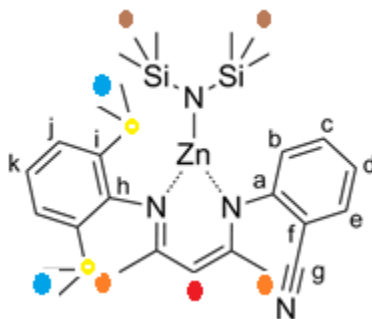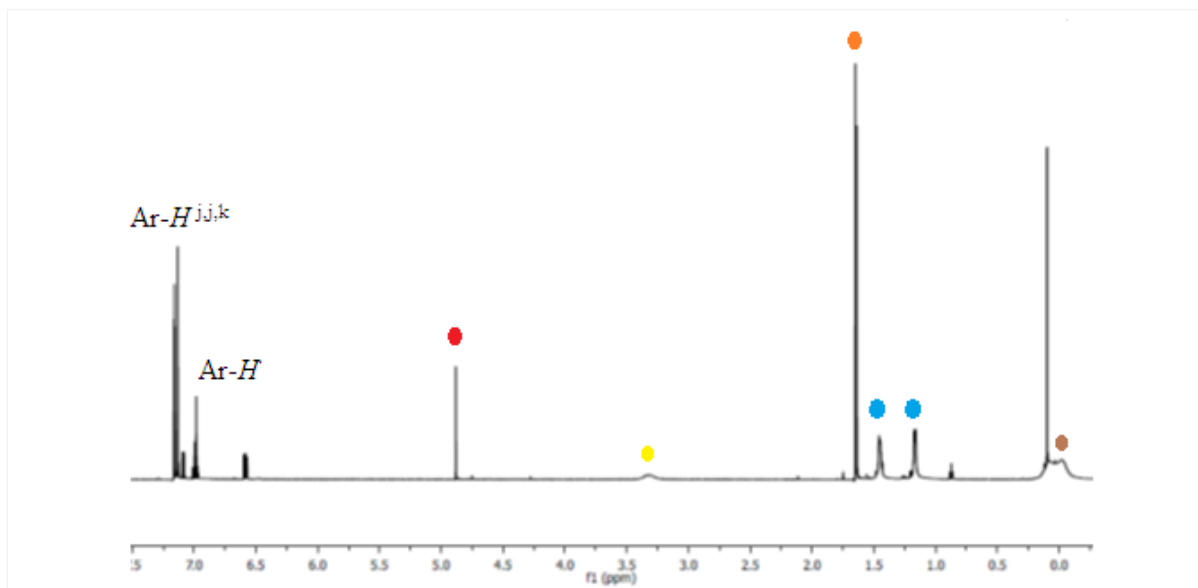

$^1\text{H}$  NMR (600 MHz,  $\text{C}_6\text{D}_6$ , 299 K)

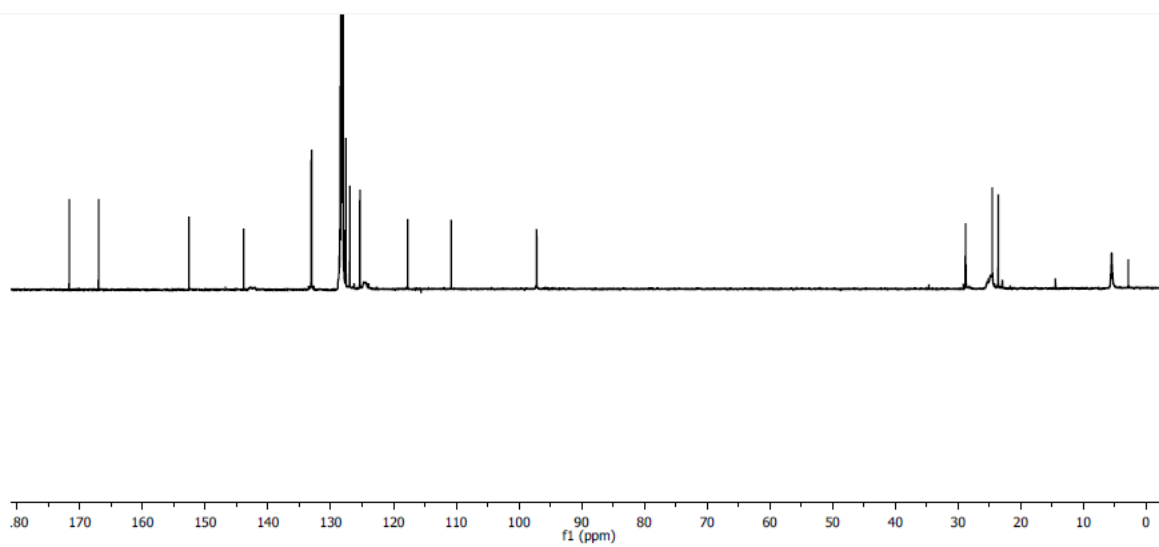

$^{13}\text{C}$  { $^1\text{H}$ } (100 MHz,  $\text{C}_6\text{D}_6$ , 299 K)

**<sup>1</sup>H NMR** (600 MHz, C<sub>6</sub>D<sub>6</sub>, 299 K): δ/ppm = 0.03 (bd, 18H, N(SiMe<sub>3</sub>)<sub>2</sub>), 1.16 (d, J = 1.16 Hz, 6H, CH(CH<sub>3</sub>)<sub>2</sub>), 1.46 (d, 6H, J = 1.16 Hz, CH(CH<sub>3</sub>)<sub>2</sub>), 1.64 (s, 3H, Me), 1.65 (s, 3H, Me), 3.33 (bs, 2H, CH(CH<sub>3</sub>)<sub>2</sub>), 4.88 (s, 1H, CH), 6.59 (m, 1H, Ar-H), 6.99 (m, 2H, Ar-H), 7.09 (m, 1H, Ar-H), 7.13 (m, 3H, Ar-H<sup>j,j,k</sup>).

**<sup>13</sup>C {<sup>1</sup>H} NMR** (100 MHz, C<sub>6</sub>D<sub>6</sub>, 299 K): δ/ppm = 5.22 (N(Si(CH<sub>3</sub>)<sub>3</sub>)<sub>2</sub>), 23.58 (CH(CH<sub>3</sub>)<sub>2</sub>), 24.51 (CH(CH<sub>3</sub>)<sub>2</sub>), 24.79 (Me), 28.77 (CH(CH<sub>3</sub>)<sub>2</sub>), 97.22 (CH), 110.77 (Ar-C), 117.67 (C≡N), 125.34 (Ar-CH), 126.98 (Ar-CH), 127.59 (Ar-CH), 128.06 (Ar-C), 128.51 (Ar-C), 133.05 (Ar-CH), 133.13 (Ar-CH), 143.87 (Ar-C), 152.59 (Ar-C), 167.01 (C=N), 171.69 (C=N).

**GCOSY** (600 MHz / 600 MHz, C<sub>6</sub>D<sub>6</sub>, 299 K): δ (<sup>1</sup>H)/ δ (<sup>1</sup>H) = 1.16/ 3.33 (CH(CH<sub>3</sub>)<sub>2</sub>/ CH(CH<sub>3</sub>)<sub>2</sub>), 3.33/ 1.16, 1.46 (CH(CH<sub>3</sub>)<sub>2</sub>/ CH(CH<sub>3</sub>)<sub>2</sub>, CH(CH<sub>3</sub>)<sub>2</sub>), 6.59/ 6.99, 7.09 (Ar-H/ Ar-H, Ar-H), 6.99/ 6.59 (Ar-H/ Ar-H), 7.09/ 6.59, 6.99 (Ar-H/ Ar-H, Ar-H).

**<sup>13</sup>C-GHSQC** (600 MHz / 100 MHz, C<sub>6</sub>D<sub>6</sub>, 299 K): δ (<sup>1</sup>H)/ δ (<sup>13</sup>C) = 0.03/ 5.22 (N(Si(CH<sub>3</sub>)<sub>3</sub>)<sub>2</sub>/ N(Si(CH<sub>3</sub>)<sub>3</sub>)<sub>2</sub>), 1.16/ 23.58 (CH(CH<sub>3</sub>)<sub>2</sub>/ CH(CH<sub>3</sub>)<sub>2</sub>), 1.46/ 24.51 (CH(CH<sub>3</sub>)<sub>2</sub>/ CH(CH<sub>3</sub>)<sub>2</sub>), 1.64/ 24.79 (Me/ Me), 1.65/ 24.79 (Me/ Me), 3.33/ 28.77 (CH(CH<sub>3</sub>)<sub>2</sub>/ CH(CH<sub>3</sub>)<sub>2</sub>), 4.88/ 97.22 (CH/ CH), 6.59/ 125.34 (Ar-H/ Ar-CH), 6.99/ 127.59, 133.05 (Ar-H/ Ar-CH, Ar-CH), 7.09/ 133.13 (Ar-H/ Ar-CH), 7.13/ 126.98 (Ar-H/ Ar-CH).

**<sup>1</sup>H, <sup>13</sup>C-GHMQC** (600 MHz / 100 MHz, C<sub>6</sub>D<sub>6</sub>, 299 K): δ (<sup>1</sup>H)/ δ (<sup>13</sup>C) = 0.03/ 5.22 (N(Si(CH<sub>3</sub>)<sub>3</sub>)<sub>2</sub>/ N(Si(CH<sub>3</sub>)<sub>3</sub>)<sub>2</sub>), 1.16/ 23.58, 24.79, 143.87 (CH(CH<sub>3</sub>)<sub>2</sub>/ CH(CH<sub>3</sub>)<sub>2</sub>, CH, Ar-C), 1.46/ 24.5, 24.79, 143.87, 152.59 (CH(CH<sub>3</sub>)<sub>2</sub>/ CH(CH<sub>3</sub>)<sub>2</sub>, CH, Ar-C, Ar-C), 1.64/ 97.22, 167.01 (Me/ CH, C=N), 1.65/ 97.22, 171.69 (Me/ CH, C=N), 4.88/ 24.79, 143.87, 152.59, 167.01, 171.69 (CH/ Me, Ar-C, Ar-C, C=N, C=N), 6.59/ 110.77, 127.59 (Ar-H/ Ar-C, Ar-CH), 6.99/ 127.59, 133.05 (Ar-H/ Ar-CH, Ar-CH), 6.99/ 117.67, 125.34, 133.13, 152.59 (Ar-H/ C≡N, Ar-CH, Ar-CH, Ar-C), 7.09/ 117.67, 133.13, 152.59 (Ar-H/ C≡N, Ar-CH, Ar-C), 7.13/ 23.58, 24.51, 125.34, 143.87 (Ar-H/ CH(CH<sub>3</sub>)<sub>2</sub>, CH(CH<sub>3</sub>)<sub>2</sub>, Ar-CH, Ar-C).

**<sup>29</sup>Si, {<sup>1</sup>H}** (75 MHz, C<sub>6</sub>D<sub>6</sub>, 299 K): δ = 0.05 ppm.

**DPFGNOE** (600 MHz, C<sub>6</sub>D<sub>6</sub>, 299 K): δ (<sup>1</sup>H<sub>ir</sub>) / δ (<sup>1</sup>H<sub>res</sub>) = 1.16/ 1.46, 1.64, 1.65, 3.33, 7.13 (CH(CH<sub>3</sub>)<sub>2</sub>/ CH(CH<sub>3</sub>)<sub>2</sub>, Me, Me, CH(CH<sub>3</sub>)<sub>2</sub>, Ar-H), 1.46/ 3.33, 7.13 (CH(CH<sub>3</sub>)<sub>2</sub>/ CH(CH<sub>3</sub>)<sub>2</sub>, Ar-H), 1.64/ 3.33, 4.88, 6.59 (Me/ CH(CH<sub>3</sub>)<sub>2</sub>, CH, Ar-H), 6.59/ 6.99, 7.09 (Ar-H/ Ar-H, Ar-H), 6.99/ 7.09 (Ar-H/ Ar-H), 7.13/ 1.16, 1.46 (Ar-H/ CH(CH<sub>3</sub>)<sub>2</sub>, CH(CH<sub>3</sub>)<sub>2</sub>).

**1D TOCSY** (600 MHz, C<sub>6</sub>D<sub>6</sub>, 299 K):  $\delta$  (<sup>1</sup>H<sub>ir</sub>) /  $\delta$  (<sup>1</sup>H<sub>res</sub>) = 1.16/ 1.46, 3.33 (CH(CH<sub>3</sub>)<sub>2</sub>/ CH(CH<sub>3</sub>)<sub>2</sub>, CH(CH<sub>3</sub>)<sub>2</sub>), 1.46/ 1.16, 3.33 (CH(CH<sub>3</sub>)<sub>2</sub>/ CH(CH<sub>3</sub>)<sub>2</sub>, CH(CH<sub>3</sub>)<sub>2</sub>), 6.59/ 6.99, 7.09 (Ar-H/ Ar-H, Ar-H).

**IR (KBr):**  $\nu/\text{cm}^{-1}$  = 2225 ( $\nu$  (C $\equiv$ N), s).

**Elemental analysis** (%) C<sub>30</sub>H<sub>46</sub>N<sub>4</sub>Si<sub>2</sub>Zn (M = 584.2640 g/mol): calculated C 61.67, H 7.94, N 9.59; found C 62.13, H 7.47, N 9.54.

### Preparation of ZnL<sub>2</sub>N(SiMe<sub>3</sub>)<sub>2</sub>, **2**.

Zn{N(SiMe<sub>3</sub>)<sub>2</sub>}<sub>2</sub> (154.3 mg, 332.9  $\mu\text{mol}$ ) and L<sub>2</sub>H (100 mg, 332.9  $\mu\text{mol}$ ) were dissolved in toluene and stirred at 80 °C for 12 h. Evaporation of the solvent yielded a yellow, air-sensitive solid, that was washed with 5 ml cold pentane, and dried *in vacuo*. Yield: 131 mg (249.5  $\mu\text{mol}$ , 75 %). Single crystals for X-ray crystallography were grown by layering pentane onto a toluene solution of compound (**2**) at -30 °C.

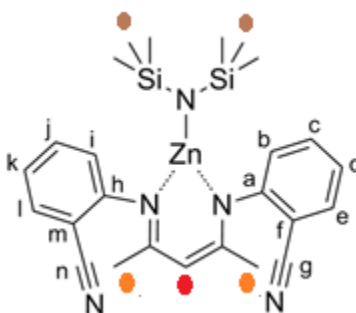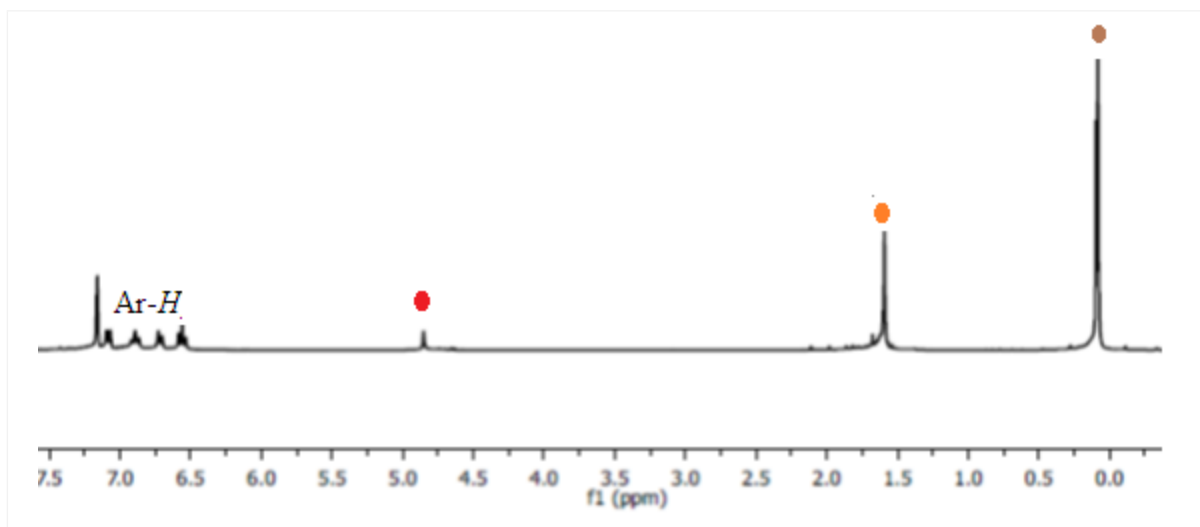

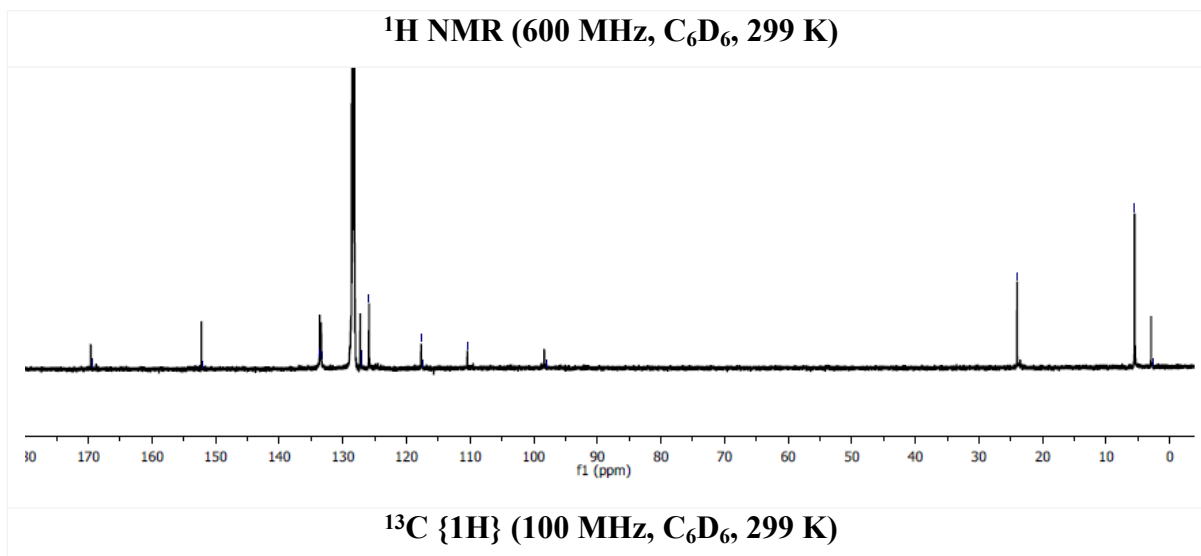

**$^1\text{H}$  NMR** (600 MHz,  $\text{C}_6\text{D}_6$ , 299 K):  $\delta$ /ppm = 0.00 (s, 18H,  $\text{N}(\text{SiMe}_3)_2$ ), 1.59 (s, 6H, *Me*), 4.85 (s, 1H, *CH*), 6.54 (m, 2H, *Ar-H*), 6.70 (m, 2H, *Ar-H*), 6.89 (m, 2H, *Ar-H*), 7.09 (m, 2H, *Ar-H*).

**$^{13}\text{C}$  { $^1\text{H}$ }** NMR (100 MHz,  $\text{C}_6\text{D}_6$ , 299 K):  $\delta$ /ppm = 5.24 ( $\text{N}(\text{Si}(\text{CH}_3)_3)_2$ ), 23.73 (*Me*), 97.76 (*CH*), 110.15 (*Ar-C*), 117.42 ( $\text{C}\equiv\text{N}$ ), 125.59 (*Ar-CH*), 126.67 (*Ar-CH*), 126.98 (*Ar-C*), 126.79 (*Ar-C*), 133.02 (*Ar-CH*), 133.38 (*Ar-CH*), 151.86 (*Ar-C*), 169.13 ( $\text{C}=\text{N}$ ).

**GCOSY** (600 MHz / 600 MHz,  $\text{C}_6\text{D}_6$ , 299 K):  $\delta$  ( $^1\text{H}$ ) /  $\delta$  ( $^1\text{H}$ ) = 6.54 / 6.89, 7.09 (*Ar-CH* / *Ar-CH*, *Ar-CH*), 6.70 / 6.89 (*Ar-CH* / *Ar-CH*), 6.89 / 6.54, 6.70 (*Ar-H* / *Ar-H*, *Ar-H*), 7.09 / 6.54 (*Ar-H* / *Ar-H*).

**$^{13}\text{C}$ -GHSQC** (600 MHz / 100 MHz,  $\text{C}_6\text{D}_6$ , 299 K):  $\delta$  ( $^1\text{H}$ ) /  $\delta$  ( $^{13}\text{C}$ ) = 0.00 / 5.24 ( $\text{N}(\text{Si}(\text{CH}_3)_3)_2$  /  $\text{N}(\text{Si}(\text{CH}_3)_3)_2$ ), 1.59 / 23.73 (*Me* / *Me*), 4.85 / 97.76 (*CH* / *CH*), 6.54 / 125.59 (*Ar-H* / *Ar-CH*), 6.70 / 126.67 (*Ar-H* / *Ar-CH*), 6.89 / 133.02 (*Ar-H* / *Ar-CH*), 7.09 / 133.38 (*Ar-H* / *Ar-CH*).

**$^1\text{H}$ ,  $^{13}\text{C}$ -GHMQC** (600 MHz / 100 MHz,  $\text{C}_6\text{D}_6$ , 299 K):  $\delta$  ( $^1\text{H}$ ) /  $\delta$  ( $^{13}\text{C}$ ) = 0.00 / 5.24 ( $\text{N}(\text{Si}(\text{CH}_3)_3)_2$  /  $\text{N}(\text{Si}(\text{CH}_3)_3)_2$ ), 1.59 / 97.76, 169.13 (*Me* / *CH*,  $\text{C}=\text{N}$ ), 4.85 / 23.73 (*CH* / *Me*), 6.54 / 110.15, 126.67 (*Ar-H* / *Ar-C*, *Ar-CH*).

**$^{29}\text{Si}$ , { $^1\text{H}$ }** (75 MHz,  $\text{C}_6\text{D}_6$ , 299 K):  $\delta$  = - 0.05 ppm.

**DPFGNOE** (600 MHz,  $\text{C}_6\text{D}_6$ , 299 K):  $\delta$  ( $^1\text{H}_{\text{ir}}$ ) /  $\delta$  ( $^1\text{H}_{\text{res}}$ ) = 1.59 / 14.85 (*Me* / *CH*), 6.54 / 7.09 (*Ar-H* / *Ar-H*).

**1D TOCSY** (600 MHz, C<sub>6</sub>D<sub>6</sub>, 299 K):  $\delta$  (<sup>1</sup>H<sub>ir</sub>) /  $\delta$  (<sup>1</sup>H<sub>res</sub>) = 1.59/ 14.85 (*Me/ CH*), 6.54/ 6.70, 6.89, 7.09 (*Ar-H/ Ar-H, Ar-H, Ar-H*).

**IR (KBr):**  $\nu/\text{cm}^{-1}$  = 2226 ( $\nu$  (C $\equiv$ N), s).

**Elemental analysis (%)** C<sub>25</sub>H<sub>33</sub>N<sub>5</sub>Si<sub>2</sub>Zn (M = 525.1140 g/mol): calculated C 57.18, H 6.33, N 13.34; found C 57.23, H 6.01, N 13.21.

### Preparation of ZnL<sub>1</sub>N(SiMe<sub>3</sub>)<sub>2</sub> \* B(C<sub>6</sub>F<sub>5</sub>)<sub>3</sub>, **3**.

1 eq of Tris(pentafluorophenyl)borane (17.6 mg in 2 mL of toluene, 34.2 mmol) was added to a toluene solution of **1** (20 mg, 34.2 mmol). The reaction mixture was stirred for 10 min, filtered and dried several hours under vacuum. Compound **3** was isolated as bright yellow solid in 81 % yield.

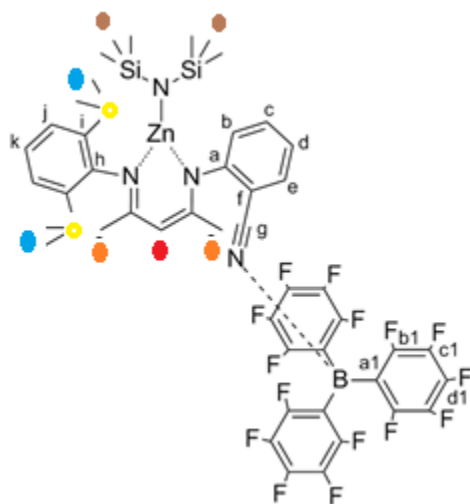

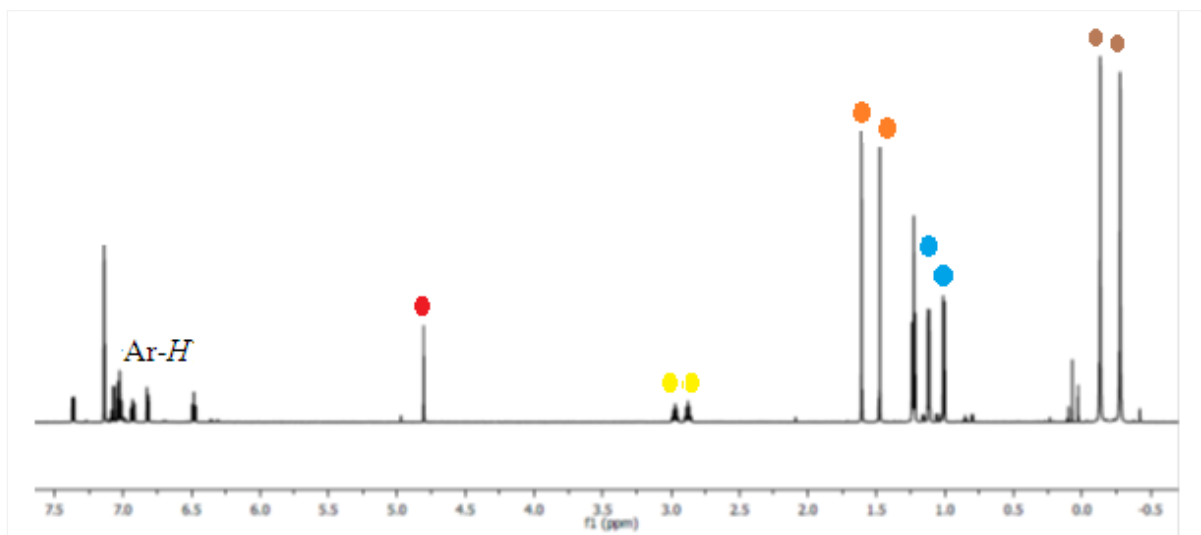

**$^1\text{H}$  NMR (600 MHz,  $\text{C}_6\text{D}_6$ , 299 K)**

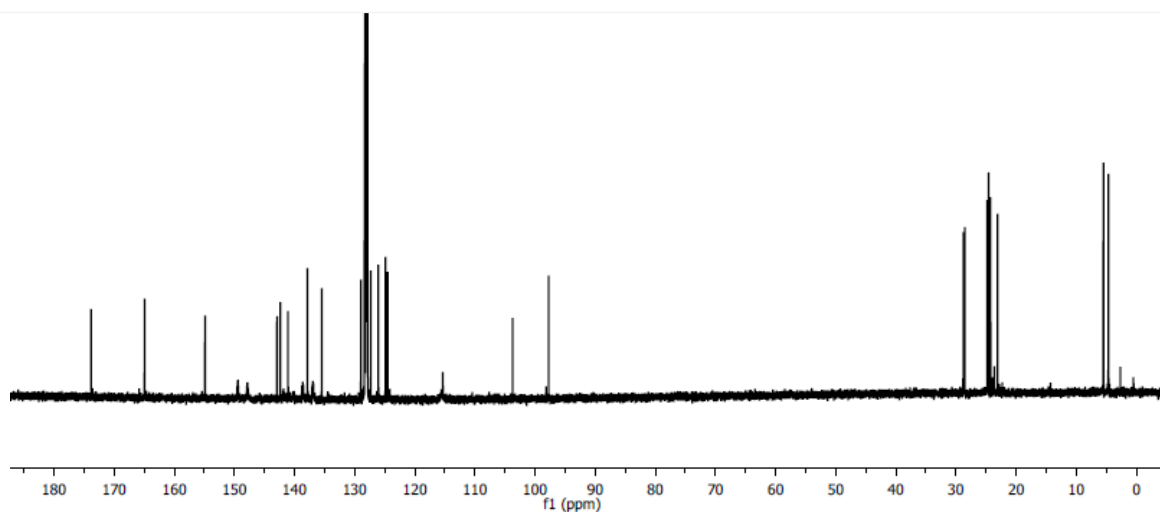

**$^{13}\text{C}$   $\{^1\text{H}\}$  NMR (100 MHz,  $\text{C}_6\text{D}_6$ , 299 K)**

**$^1\text{H}$  NMR** (600 MHz,  $\text{C}_6\text{D}_6$ , 299 K):  $\delta/\text{ppm}$  = 0.11 (s, 9H,  $\text{N}(\text{SiMe}_3)_2$ ), 0.25 (s, 9H,  $\text{N}(\text{SiMe}_3)_2$ ), 1.03 (d,  $J$  = 1.14 Hz, 3H,  $\text{CH}(\text{CH}_3)_2$ ), 1.15 (d,  $J$  = 1.14 Hz, 3H,  $\text{CH}(\text{CH}_3)_2$ ), 1.25 (m, 6H,  $\text{CH}(\text{CH}_3)_2$ ), 1.50 (s, 3H, *Me*), 1.63 (s, 3H, *Me*), 2.9 (s, 1H,  $\text{CH}(\text{CH}_3)_2$ ), 2.99 (s, 1H,  $\text{CH}(\text{CH}_3)_2$ ), 4.83 (s, 1H, *CH*), 6.50 (m, 1H,  $\text{Ar-H}^d$ ), 6.85 (m, 1H,  $\text{Ar-H}$ ), 6.95 (m, 1H,  $\text{Ar-H}$ ), 7.05 (m, 2H,  $\text{Ar-H}$ ), 7.10 (m, 1H,  $\text{Ar-H}$ ), 7.38 (m, 1H,  $\text{Ar-H}^e$ ).

**$^{13}\text{C}$   $\{^1\text{H}\}$  NMR** (100 MHz,  $\text{C}_6\text{D}_6$ , 299 K):  $\delta/\text{ppm}$  = 4.61 ( $\text{N}(\text{SiMe}_3)_2$ ), 5.47 ( $\text{N}(\text{SiMe}_3)_2$ ), 23.04 (*Me*), 24.23 (*Me*), 24.53 ( $\text{CH}(\text{CH}_3)_2$ ), 24.57 ( $\text{CH}(\text{CH}_3)_2$ ), 24.70 ( $\text{CH}(\text{CH}_3)_2$ ), 24.77 ( $\text{CH}(\text{CH}_3)_2$ ), 28.52 ( $\text{CH}(\text{CH}_3)_2$ ), 28.72 ( $\text{CH}(\text{CH}_3)_2$ ), 97.73 (*CH*), 103.72 ( $\text{Ar-C}$ ), 115.32

(C≡N), 124.49 (Ar-CH), 124.87 (Ar-CH), 126.04 (Ar-CH<sup>d</sup>), 127.28 (Ar-CH), 128.95 (Ar-CH), 135.53 (Ar-CH<sup>e</sup>), 137.04 (Ar<sup>F5</sup>-C), 137.89 (Ar-CH), 138.56 (Ar<sup>F5</sup>-C), 140.13 (Ar<sup>F5</sup>-C), 141.02 (Ar-C), 141.79 (Ar<sup>F5</sup>-C), 142.35 (Ar-C), 142.87 (Ar-C), 147.78 (Ar<sup>F5</sup>-C), 149.40 (Ar<sup>F5</sup>-C), 154.83 (Ar-C), 165.02 (C=N), 173.85 (C=N).

**GCOSY** (600 MHz / 600 MHz, C<sub>6</sub>D<sub>6</sub>, 299 K): δ (<sup>1</sup>H) / δ (<sup>1</sup>H) = 1.03/ 2.9, 2.99 (CH(CH<sub>3</sub>)<sub>2</sub> / CH(CH<sub>3</sub>)<sub>2</sub>, CH(CH<sub>3</sub>)<sub>2</sub>), 1.15/ 2.9, 2.99 (CH(CH<sub>3</sub>)<sub>2</sub> / CH(CH<sub>3</sub>)<sub>2</sub>, CH(CH<sub>3</sub>)<sub>2</sub>), 1.25/ 2.9, 2.99 (CH(CH<sub>3</sub>)<sub>2</sub> / CH(CH<sub>3</sub>)<sub>2</sub>, CH(CH<sub>3</sub>)<sub>2</sub>), 2.9/ 1.03, 1.15, 1.25 (CH(CH<sub>3</sub>)<sub>2</sub> / CH(CH<sub>3</sub>)<sub>2</sub>, CH(CH<sub>3</sub>)<sub>2</sub>, CH(CH<sub>3</sub>)<sub>2</sub>), 2.99/ 1.03, 1.15, 1.25 (CH(CH<sub>3</sub>)<sub>2</sub> / CH(CH<sub>3</sub>)<sub>2</sub>, CH(CH<sub>3</sub>)<sub>2</sub>, CH(CH<sub>3</sub>)<sub>2</sub>), 4.83/ 1.50, 1.63 (CH/ Me, Me), 6.50/ 6.85, 7.38 (Ar-H<sup>d</sup>/ Ar-H, Ar-H<sup>e</sup>), 6.85/ 6.95 (Ar-H/ Ar-H), 6.95/ 6.85 (Ar-H/ Ar-H), 7.05/ 7.10 (Ar-H/ Ar-H), 7.10/ 7.05 (Ar-H/ Ar-H), 7.38/ 6.50 (Ar-H<sup>e</sup>/ Ar-H<sup>d</sup>).

**<sup>13</sup>C-GHSQC** (600 MHz / 100 MHz, C<sub>6</sub>D<sub>6</sub>, 299 K): δ (<sup>1</sup>H) / δ (<sup>13</sup>C) = 0.25/ 4.61 (N(SiMe<sub>3</sub>)<sub>2</sub> / N(SiMe<sub>3</sub>)<sub>2</sub>), 0.11/ 5.47 (N(SiMe<sub>3</sub>)<sub>2</sub> / N(SiMe<sub>3</sub>)<sub>2</sub>), 1.03/ 24.53 (CH(CH<sub>3</sub>)<sub>2</sub> / CH(CH<sub>3</sub>)<sub>2</sub>), 1.15/ 24.57 (CH(CH<sub>3</sub>)<sub>2</sub> / CH(CH<sub>3</sub>)<sub>2</sub>), 1.25/ 24.70, 24.77 (CH(CH<sub>3</sub>)<sub>2</sub> / CH(CH<sub>3</sub>)<sub>2</sub>, CH(CH<sub>3</sub>)<sub>2</sub>), 1.50/ 23.04 (Me/ Me), 1.63/ 24.23 (Me/ Me), 2.9/ 28.52 (CH(CH<sub>3</sub>)<sub>2</sub> / CH(CH<sub>3</sub>)<sub>2</sub>), 2.99/ 28.72 (CH(CH<sub>3</sub>)<sub>2</sub> / CH(CH<sub>3</sub>)<sub>2</sub>), 4.83/ 97.73 (CH/ CH), 6.50/ 126.04 (Ar-CH<sup>d</sup>/ Ar-CH<sup>d</sup>), 6.85/ 128.95 (Ar-CH/ Ar-CH), 6.95/ 137.89 (Ar-CH/ Ar-CH), 7.05/ 124.49, 124.87 (Ar-CH/ Ar-CH, Ar-CH), 7.10/ 127.28 (Ar-CH/ Ar-CH), 7.38/ 135.53 (Ar-CH<sup>e</sup>/ Ar-CH).

**<sup>1</sup>H, <sup>13</sup>C-GHMQC** (600 MHz / 100 MHz, C<sub>6</sub>D<sub>6</sub>, 299 K): δ (<sup>1</sup>H) / δ (<sup>13</sup>C) = 0.25/ 4.61 (N(SiMe<sub>3</sub>)<sub>2</sub> / N(SiMe<sub>3</sub>)<sub>2</sub>), 0.11/ 5.47 (N(SiMe<sub>3</sub>)<sub>2</sub> / N(SiMe<sub>3</sub>)<sub>2</sub>), 1.03/ 24.53, 24.57, 28.52, 141.02 (CH(CH<sub>3</sub>)<sub>2</sub> / CH(CH<sub>3</sub>)<sub>2</sub>, CH(CH<sub>3</sub>)<sub>2</sub>, CH(CH<sub>3</sub>)<sub>2</sub>, Ar-C), 1.15/ 24.53, 28.52, 142.35 (CH(CH<sub>3</sub>)<sub>2</sub> / CH(CH<sub>3</sub>)<sub>2</sub>, CH(CH<sub>3</sub>)<sub>2</sub>, Ar-C), 1.25/ 24.70, 24.77, 28.52, 141.02, 142.35 (CH(CH<sub>3</sub>)<sub>2</sub> / CH(CH<sub>3</sub>)<sub>2</sub>, CH(CH<sub>3</sub>)<sub>2</sub>, CH(CH<sub>3</sub>)<sub>2</sub>, Ar-C, Ar-C), 1.50/ 97.73, 165.02 (Me/ CH, C=N), 1.63/ 97.73, 173.85 (Me/ CH, C=N), 2.9/ 24.70, 24.77, 124.49, 141.02, 142.87 (CH(CH<sub>3</sub>)<sub>2</sub> / CH(CH<sub>3</sub>)<sub>2</sub>, CH(CH<sub>3</sub>)<sub>2</sub>, Ar-CH, Ar-C, Ar-C), 2.99/ 24.53, 24.57, 124.87, 142.35 (CH(CH<sub>3</sub>)<sub>2</sub> / CH(CH<sub>3</sub>)<sub>2</sub>, CH(CH<sub>3</sub>)<sub>2</sub>, Ar-CH, Ar-C), 4.83/ 23.04, 24.23, 142.87, 154.83, 165.02, 173.85 (CH/ Me, Me, Ar-C, Ar-C, C=N, C=N), 6.50/ 103.72, 128.95 (Ar-CH<sup>d</sup>/ Ar-C, Ar-CH), 6.85/ 103.72, 126.04 (Ar-CH/ Ar-C, Ar-CH<sup>d</sup>), 6.95/ 135.53, 154.83 (Ar-CH/ Ar-CH<sup>e</sup>, Ar-C), 7.05/ 28.52, 28.72, 124.49, 124.87, 141.02, 142.35, 142.87 (Ar-CH/ CH(CH<sub>3</sub>)<sub>2</sub>, CH(CH<sub>3</sub>)<sub>2</sub>, Ar-CH, Ar-CH, Ar-C, Ar-C, Ar-C), 7.10/ 141.02 (Ar-CH/ Ar-C), 7.38/ 115.32, 154.83 (Ar-CH<sup>e</sup>/ C≡N, Ar-C).



**DPFGNOE** (600 MHz, C<sub>6</sub>D<sub>6</sub>, 299 K):  $\delta$  (<sup>1</sup>H<sub>ir</sub>) /  $\delta$  (<sup>1</sup>H<sub>res</sub>) = 0.11/ 0.25, 1.25, 2.9, 2.99, 6.85 (N(SiMe<sub>3</sub>)<sub>2</sub>/ N(SiMe<sub>3</sub>)<sub>2</sub>, CH(CH<sub>3</sub>)<sub>2</sub>, CH(CH<sub>3</sub>)<sub>2</sub>, CH(CH<sub>3</sub>)<sub>2</sub>, Ar-CH), 0.25/ 0.11, 1.25, 2.9, 2.99, 6.85 (N(SiMe<sub>3</sub>)<sub>2</sub>/ N(SiMe<sub>3</sub>)<sub>2</sub>, CH(CH<sub>3</sub>)<sub>2</sub>, CH(CH<sub>3</sub>)<sub>2</sub>, CH(CH<sub>3</sub>)<sub>2</sub>, Ar-CH), 1.03/ 1.15, 1.25, 1.63, 2.9, 6.95 (CH(CH<sub>3</sub>)<sub>2</sub>/ CH(CH<sub>3</sub>)<sub>2</sub>, CH(CH<sub>3</sub>)<sub>2</sub>, CH(CH<sub>3</sub>)<sub>2</sub>, CH(CH<sub>3</sub>)<sub>2</sub>, Ar-CH), 1.15/ 1.03, 1.25, 1.63, 2.99, 6.95 (CH(CH<sub>3</sub>)<sub>2</sub>/ CH(CH<sub>3</sub>)<sub>2</sub>, CH(CH<sub>3</sub>)<sub>2</sub>, CH(CH<sub>3</sub>)<sub>2</sub>, CH(CH<sub>3</sub>)<sub>2</sub>, Ar-CH), 1.63/ 2.9, 2.99, 6.95 (CH/ CH(CH<sub>3</sub>)<sub>2</sub>, CH(CH<sub>3</sub>)<sub>2</sub>, Ar-H), 1.50/ 4.83 (Me/ CH), 1.63/ 0.11, 0.25, 4.83, (Me/ N(SiMe<sub>3</sub>)<sub>2</sub>, N(SiMe<sub>3</sub>)<sub>2</sub>, CH), 4.83/ 1.50, 1.63 (CH/ Me, Me), 7.38/ 6.50 (Ar-H<sup>e</sup>/ Ar-H<sup>d</sup>).

**1D TOCSY** (600 MHz, C<sub>6</sub>D<sub>6</sub>, 299 K):  $\delta$  (<sup>1</sup>H<sub>ir</sub>) /  $\delta$  (<sup>1</sup>H<sub>res</sub>) = 0.11/ 0.25 (N(SiMe<sub>3</sub>)<sub>2</sub>/ N(SiMe<sub>3</sub>)<sub>2</sub>), 0.25/ 0.11 (N(SiMe<sub>3</sub>)<sub>2</sub>/ N(SiMe<sub>3</sub>)<sub>2</sub>), 1.03/ 1.25, 2.9 (CH(CH<sub>3</sub>)<sub>2</sub>/ CH(CH<sub>3</sub>)<sub>2</sub>, CH(CH<sub>3</sub>)<sub>2</sub>), 1.15/ 1.25, 2.99 (CH(CH<sub>3</sub>)<sub>2</sub>/ CH(CH<sub>3</sub>)<sub>2</sub>, CH(CH<sub>3</sub>)<sub>2</sub>), 1.25/ 1.03, 1.15, 2.9, 2.99 (CH(CH<sub>3</sub>)<sub>2</sub>/ CH(CH<sub>3</sub>)<sub>2</sub>, CH(CH<sub>3</sub>)<sub>2</sub>, CH(CH<sub>3</sub>)<sub>2</sub>, CH(CH<sub>3</sub>)<sub>2</sub>), 2.9/ 1.03, 1.25 (CH(CH<sub>3</sub>)<sub>2</sub>/ CH(CH<sub>3</sub>)<sub>2</sub>, CH(CH<sub>3</sub>)<sub>2</sub>), 2.99/ 1.15, 1.25 (CH(CH<sub>3</sub>)<sub>2</sub>/ CH(CH<sub>3</sub>)<sub>2</sub>, CH(CH<sub>3</sub>)<sub>2</sub>), 4.83/ 1.50, 1.63 (CH/ Me, Me), 6.50/ 6.85, 6.95, 7.38 (Ar-H<sup>d</sup>/ Ar-H, Ar-H, Ar-H<sup>e</sup>), 6.85/ 6.50, 6.95 7.38 (Ar-H/ Ar-H<sup>d</sup>, Ar-H, Ar-H<sup>e</sup>), 6.95/ 6.50, 6.85, 7.38 (Ar-H/ Ar-H<sup>d</sup>, Ar-H, Ar-H<sup>e</sup>), 7.38/ 6.50, 6.85, 6.95 (Ar-H<sup>e</sup>/ Ar-H<sup>d</sup>, Ar-H, Ar-H).

**<sup>19</sup>F NMR** (564 MHz, C<sub>6</sub>D<sub>6</sub>, 299 K):  $\delta$  -162.89 (m, 4F, m-C<sub>6</sub>F<sub>5</sub>), -155.67 (m, 2F, p-C<sub>6</sub>F<sub>5</sub>), -133.64 (m, 4F, o-C<sub>6</sub>F<sub>5</sub>) ppm.

**<sup>11</sup>B NMR** (192 MHz, C<sub>6</sub>D<sub>6</sub>, 299 K):  $\delta$  -9.74 ppm.

**IR (KBr):**  $\nu$ /cm<sup>-1</sup> = 2305 ( $\nu$  (C $\equiv$ N), s).

**Elemental analysis (%)** C<sub>48</sub>H<sub>46</sub>BF<sub>15</sub>N<sub>4</sub>Si<sub>2</sub>Zn (M = 1096.2437 g/mol): calculated C 52.59 H 4.23, N 5.11; found C 52.60, H 4.33, N 5.10.

#### **Preparation of ZnL<sub>2</sub>N(SiMe<sub>3</sub>)<sub>2</sub> \* 2B(C<sub>6</sub>F<sub>5</sub>)<sub>3</sub>, **4**.**

2 eq of Tris(pentafluorophenyl)borane (39 mg in 1 mL of toluene, 76.2 mmol) was added to a toluene solution of **2** (20 mg, 38 mmol). The reaction mixture was stirred for 10 min, filtered and dried several hours under vacuum. Compound **4** was isolated as bright yellow solid in 83 % yield. Single crystals for X-ray crystallography were grown by layering pentane onto a toluene solution of compound (**4**) at -30 °C.

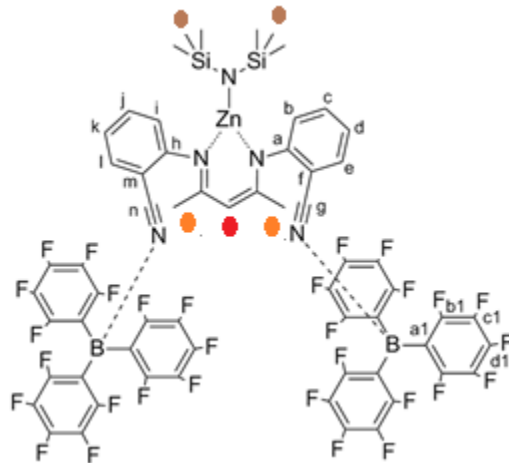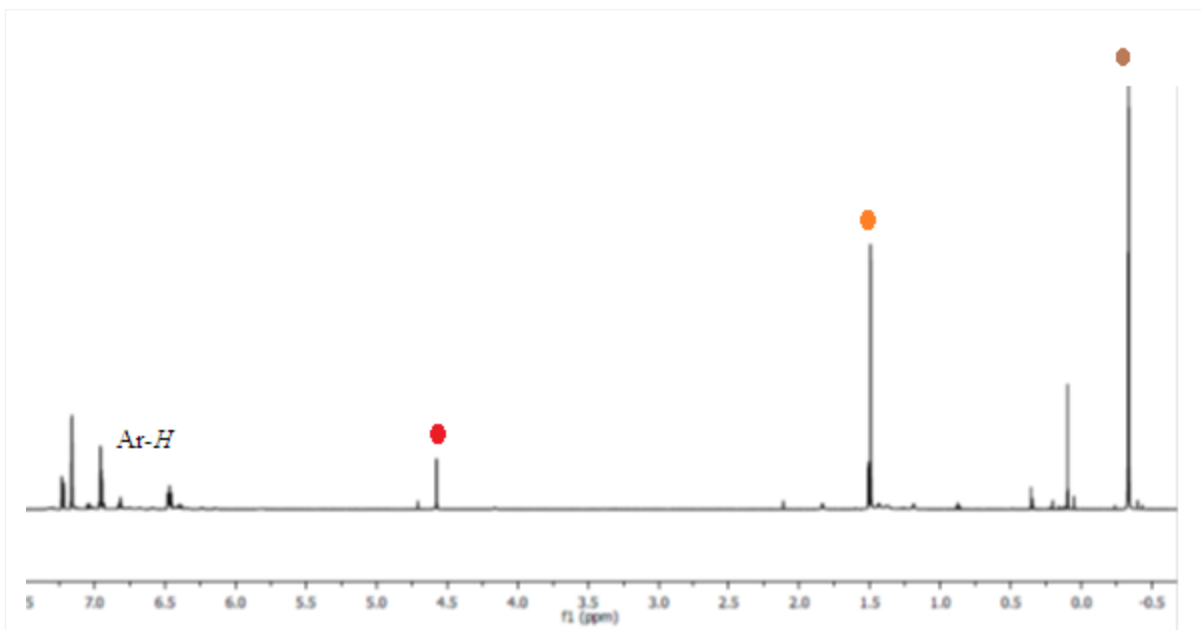

$^1\text{H}$  NMR (600 MHz,  $\text{C}_6\text{D}_6$ , 299 K)

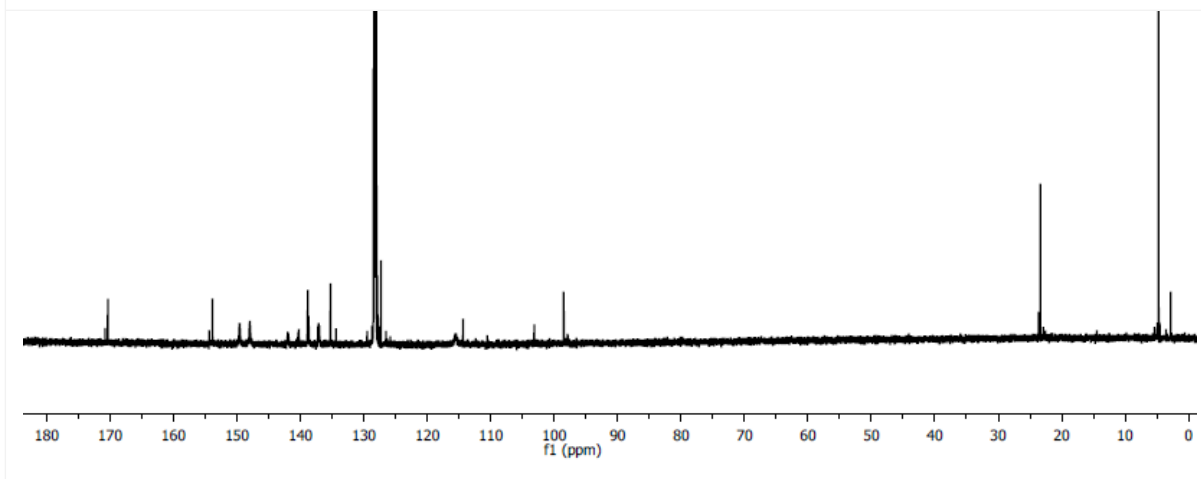

**$^{13}\text{C}$  { $^1\text{H}$ } (100 MHz,  $\text{C}_6\text{D}_6$ , 299 K)**

**$^1\text{H}$  NMR** (600 MHz,  $\text{C}_6\text{D}_6$ , 299 K):  $\delta/\text{ppm} = 0.33$  (s, 18H,  $\text{N}(\text{SiMe}_3)_2$ ), 1.50 (s, 6H, *Me*), 4.57 (s, 1H, *CH*), 6.48 (m, 2H, *Ar-H<sup>b</sup>*), 6.95 (m, 4H, *Ar-H<sup>c,d</sup>*), 7.23 (m, 2H, *Ar-H<sup>e</sup>*).

**$^{13}\text{C}$  { $^1\text{H}$ } NMR** (100 MHz,  $\text{C}_6\text{D}_6$ , 299 K):  $\delta/\text{ppm} = 4.85$  ( $\text{N}(\text{Si}(\text{CH}_3)_3)_2$ ), 23.38 (*Me*), 98.51 (*CH*), 114.48 ( $\text{C}\equiv\text{N}$ ), 115.48 (*Ar-C*), 127.34 (*Ar-CH<sup>b</sup>*), 127.87 (*Ar-C*), 128.51 (*Ar-C*), 135.28 (*Ar-CH<sup>e</sup>*), 137.09 ( $\text{Ar}^{\text{F}5}\text{-C}$ ), 138.63 (*Ar-CH*), 138.71 ( $\text{Ar}^{\text{F}5}\text{-C}$ ), 140.24 ( $\text{Ar}^{\text{F}5}\text{-C}$ ), 141.93 ( $\text{Ar}^{\text{F}5}\text{-C}$ ), 147.96 ( $\text{Ar}^{\text{F}5}\text{-C}$ ), 149.70 ( $\text{Ar}^{\text{F}5}\text{-C}$ ), 153.88 (*Ar-C*), 170.38 ( $\text{C}\equiv\text{N}$ ).

**GCOSY** (600 MHz / 600 MHz,  $\text{C}_6\text{D}_6$ , 299 K):  $\delta (^1\text{H}) / \delta (^1\text{H}) = 1.50 / 4.57$  (*Me/ CH*), 4.57 / 1.50 (*CH/ Me*), 6.48 / 6.95, 7.23 (*Ar-H<sup>b</sup>/ Ar-H<sup>c,d</sup>*, *Ar-H<sup>e</sup>*), 6.95 / 6.48 (*Ar-H<sup>c,d</sup>/ Ar-H<sup>b</sup>*), 7.23 / 6.48, 6.95 (*Ar-H<sup>e</sup>/ Ar-H<sup>b</sup>*, *Ar-H<sup>c,d</sup>*).

**$^{13}\text{C}$ -GHSQC** (600 MHz / 100 MHz,  $\text{C}_6\text{D}_6$ , 299 K):  $\delta (^1\text{H}) / \delta (^{13}\text{C}) = 0.33 / 4.85$  ( $\text{N}(\text{Si}(\text{CH}_3)_3)_2 / \text{N}(\text{Si}(\text{CH}_3)_3)_2$ ), 1.50 / 23.38 (*Me/ Me*), 4.85 / 98.51 (*CH/ CH*), 6.48 / 127.34 (*Ar-H<sup>b</sup>/ Ar-CH<sup>b</sup>*), 6.95 / 127.87, 138.63 (*Ar-H<sup>c,d</sup>/ Ar-CH*, *Ar-CH*), 7.23 / 135.28 (*Ar-H<sup>e</sup>/ Ar-CH<sup>e</sup>*).

**$^1\text{H}$ ,  $^{13}\text{C}$ -GHMQC** (600 MHz / 100 MHz,  $\text{C}_6\text{D}_6$ , 299 K):  $\delta (^1\text{H}) / \delta (^{13}\text{C}) = 0.33 / 4.85$  ( $\text{N}(\text{Si}(\text{CH}_3)_3)_2 / \text{N}(\text{Si}(\text{CH}_3)_3)_2$ ), 1.50 / 98.51, 170.38 (*Me/ CH*,  $\text{C}\equiv\text{N}$ ), 4.85 / 23.38, 153.88, 170.38 (*CH/ Me*, *Ar-C*,  $\text{C}\equiv\text{N}$ ), 6.48 / 127.87 (*Ar-H<sup>b</sup>/ Ar-CH*), 6.95 / 135.28, 153.88 (*Ar-H<sup>c,d</sup>/ Ar-CH<sup>e</sup>*, *Ar-C*), 7.23 / 114.48, 138.63, 153.88 (*Ar-H<sup>e</sup>/ C $\equiv$ N*, *Ar-CH*, *Ar-C*).

**DPFGNOE** (600 MHz,  $\text{C}_6\text{D}_6$ , 299 K):  $\delta (^1\text{H}_{\text{ir}}) / \delta (^1\text{H}_{\text{res}}) = 0.33 / 7.23$  ( $\text{N}(\text{SiMe}_3)_2 / \text{Ar-H<sup>e</sup>$ ), 1.50 / 4.57 (*Me/ CH*), 6.48 / 6.95, 7.23 (*Ar-H<sup>b</sup>/ Ar-H<sup>c,d</sup>*, *Ar-H<sup>e</sup>*), 6.95 / 6.48, 7.23 (*Ar-H<sup>c,d</sup>/ Ar-H<sup>b</sup>*, *Ar-H<sup>e</sup>*), 7.23 / 6.48, 6.95 (*Ar-H<sup>e</sup>/ Ar-H<sup>b</sup>*, *Ar-H<sup>c,d</sup>*).

**1D TOCSY** (600 MHz,  $\text{C}_6\text{D}_6$ , 299 K):  $\delta (^1\text{H}_{\text{ir}}) / \delta (^1\text{H}_{\text{res}}) = 1.50 / 4.57$  (*Me/ CH*), 6.48 / 6.95, 7.23 (*Ar-H<sup>b</sup>/ Ar-H<sup>c,d</sup>*, *Ar-H<sup>e</sup>*), 6.95 / 6.48, 7.23 (*Ar-H<sup>c,d</sup>/ Ar-H<sup>b</sup>*, *Ar-H<sup>e</sup>*), 7.23 / 6.48, 6.95 (*Ar-H<sup>e</sup>/ Ar-H<sup>b</sup>*, *Ar-H<sup>c,d</sup>*).

**$^{19}\text{F}$  NMR** (564 MHz,  $\text{C}_6\text{D}_6$ , 299 K):  $\delta = -162.79$  (m, 4F, *m-C<sub>6</sub>F<sub>5</sub>*),  $-155.22$  (m, 2F, *p-C<sub>6</sub>F<sub>5</sub>*),  $-133.87$  (m, 4F, *o-C<sub>6</sub>F<sub>5</sub>*) ppm.

**$^{11}\text{B}$  NMR** (192 MHz,  $\text{C}_6\text{D}_6$ , 299 K):  $\delta = -8.62$  ppm.

**IR (KBr):**  $\nu/\text{cm}^{-1} = 2301$  ( $\nu$  ( $\text{C}\equiv\text{N}$ ), s).

**Elemental analysis (%)**  $\text{C}_{61}\text{H}_{33}\text{B}_2\text{F}_{30}\text{N}_5\text{Si}_2\text{Zn}$  (M = 1549.0733 g/mol): calculated C 47.30; H 2.15, N 4.52; found C 47.41, H 1.65, N 4.18.

### Preparation of $\text{ZnL}_1\text{C}_6\text{F}_5$ , **5**.

$\text{ZnL}_1\text{N}(\text{SiMe}_3)_2$  (**1**) (50 mg, 85.6  $\mu\text{mol}$ ) and  $\text{HB}(\text{C}_6\text{F}_5)_2$  (29.6 mg, 85.6  $\mu\text{mol}$ ) were dissolved in toluene and stirred at 80 °C for 12 h. The color of the solution was changed from yellow to orange. Evaporation of the solvent yielded pale orange, air-sensitive solid, that was washed several times with 2 ml cold pentane, and dried few hours under vacuum. Yield: 23.3 mg (39.4  $\mu\text{mol}$ , 46 %). Single crystals for X-ray crystallography were grown by layering pentane onto a toluene solution of compound (**5**) at room temperature.

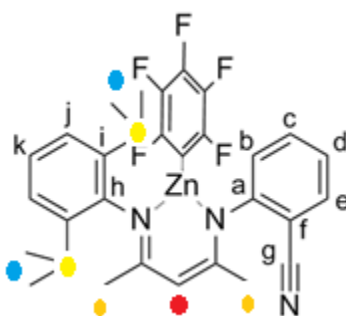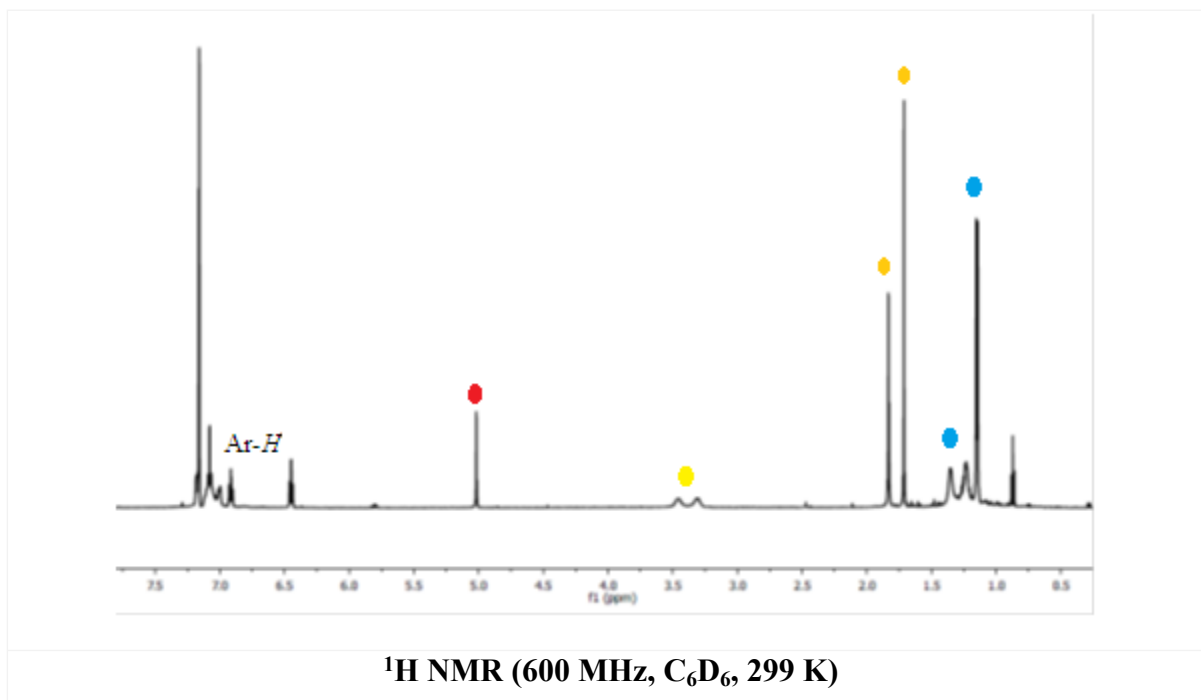

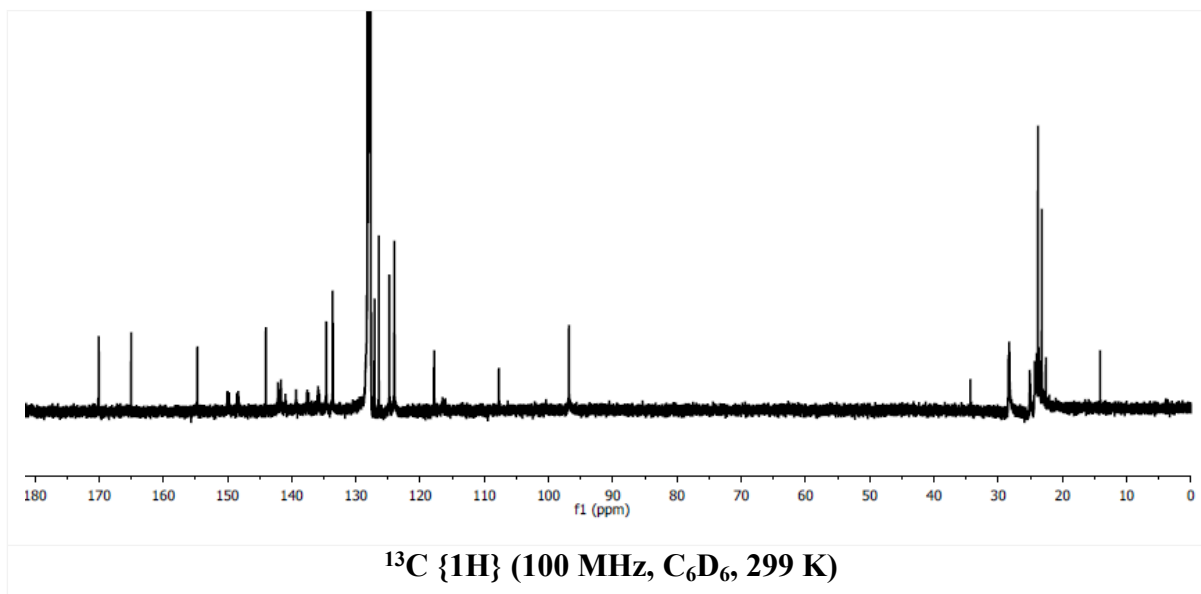

**$^1\text{H}$  NMR** (600 MHz,  $\text{C}_6\text{D}_6$ , 299 K):  $\delta/\text{ppm}$  = 1.14 (d,  $J$  = 1.15 Hz, 6H,  $\text{CH}(\text{CH}_3)_2$ ), 1.23 (bs, 3H,  $\text{CH}(\text{CH}_3)_2$ ), 1.36 (bs, 3H,  $\text{CH}(\text{CH}_3)_2$ ), 1.72 (s, 3H, *Me*), 1.83 (s, 3H, *Me*), 3.31 (bs, 2H,  $\text{CH}(\text{CH}_3)_2$ ), 3.45 (bs, 2H,  $\text{CH}(\text{CH}_3)_2$ ), 5.02 (s, 1H, CH), 6.45 (t, 1H, Ar- $H^d$ ), 6.91 (t, 1H, Ar- $H^c$ ), 7.00 (d, 1H, Ar- $H^b$ ), 7.08 (m, 3H, Ar- $H^{j,k}$ ), 7.18 (d, 1H, Ar- $H^e$ ).

**$^{13}\text{C}$  { $^1\text{H}$ } NMR** (100 MHz,  $\text{C}_6\text{D}_6$ , 299 K):  $\delta/\text{ppm}$  = 23.21 (*Me*), 23.69 (*Me*), 23.81 ( $\text{CH}(\text{CH}_3)_2$ ), 24.01 ( $\text{CH}(\text{CH}_3)_2$ ), 24.31 ( $\text{CH}(\text{CH}_3)_2$ ), 25.07 ( $\text{CH}(\text{CH}_3)_2$ ), 28.28 ( $\text{CH}(\text{CH}_3)_2$ ), 28.40 ( $\text{CH}(\text{CH}_3)_2$ ), 96.71 (CH), 107.71 (Ar-C), 117.82 ( $\text{C}\equiv\text{N}$ ), 124.02 (Ar-CH $^{j,k}$ ), 124.80 (Ar-CH $^d$ ), 126.44 (Ar-CH $^b$ ), 127.10 (Ar-C), 128.19 (Ar-C), 133.61 (Ar-CH $^e$ ), 134.62 (Ar-CH $^c$ ), 135.88 (Ar $^{\text{F5}}$ -C), 137.65 (Ar $^{\text{F5}}$ -C), 139.32 (Ar $^{\text{F5}}$ -C), 140.91 (Ar $^{\text{F5}}$ -C), 141.68 (Ar-C), 142.14 (Ar-C), 144.01 (Ar-C), 148.28 (Ar $^{\text{F5}}$ -C), 149.77 (Ar $^{\text{F5}}$ -C), 154.70 (Ar-C), 165.00 ( $\text{C}=\text{N}$ ), 170.03 ( $\text{C}=\text{N}$ ).

**GCOSY** (600 MHz / 600 MHz,  $\text{C}_6\text{D}_6$ , 299 K):  $\delta$  ( $^1\text{H}$ ) /  $\delta$  ( $^1\text{H}$ ) = 1.14 / 1.23, 1.36 ( $\text{CH}(\text{CH}_3)_2$  /  $\text{CH}(\text{CH}_3)_2$ ,  $\text{CH}(\text{CH}_3)_2$ ), 3.31 / 1.14 ( $\text{CH}(\text{CH}_3)_2$  /  $\text{CH}(\text{CH}_3)_2$ ), 3.45 / 1.14 ( $\text{CH}(\text{CH}_3)_2$  /  $\text{CH}(\text{CH}_3)_2$ ), 6.45 / 6.91, 7.18 (Ar- $H^d$  / Ar- $H^c$ , Ar- $H^e$ ), 6.91 / 6.45, 7.00, 7.18 (Ar- $H^c$  / Ar- $H^d$ , Ar- $H^b$ , Ar- $H^e$ ), 7.00 / 6.91 (Ar- $H^b$  / Ar- $H^c$ ), 7.18 / 6.45, 6.91 (Ar- $H^e$  / Ar- $H^d$ , Ar- $H^c$ ).

**$^{13}\text{C}$ -GHSQC** (600 MHz / 100 MHz,  $\text{C}_6\text{D}_6$ , 299 K):  $\delta$  ( $^1\text{H}$ ) /  $\delta$  ( $^{13}\text{C}$ ) = 1.14 / 23.21, 23.81 ( $\text{CH}(\text{CH}_3)_2$  /  $\text{CH}(\text{CH}_3)_2$ ,  $\text{CH}(\text{CH}_3)_2$ ), 1.23 / 24.31 ( $\text{CH}(\text{CH}_3)_2$  /  $\text{CH}(\text{CH}_3)_2$ ), 1.36 / 25.07 ( $\text{CH}(\text{CH}_3)_2$  /  $\text{CH}(\text{CH}_3)_2$ ), 1.72 / 23.69 (*Me* / *Me*), 1.83 / 23.21 (*Me* / *Me*), 3.31 / 28.28 ( $\text{CH}(\text{CH}_3)_2$  /  $\text{CH}(\text{CH}_3)_2$ ), 3.45 / 28.40 ( $\text{CH}(\text{CH}_3)_2$  /  $\text{CH}(\text{CH}_3)_2$ ), 5.02 / 96.71 (CH / CH), 6.45 /

124.80 (Ar- $H^d$ / Ar- $CH^d$ ), 6.91/ 134.62 (Ar- $H^c$ / Ar- $CH^c$ ), 7.00/ 126.44 (Ar- $H^b$ / Ar- $CH^b$ ), 7.08/ 124.02 (Ar- $H^{i,k}$ / Ar- $CH^{i,k}$ ), 7.18/ 133.61 (Ar- $H^e$ / Ar- $CH^e$ ).

**$^1H$ ,  $^{13}C$ -GHMQC** (600 MHz / 100 MHz,  $C_6D_6$ , 299 K):  $\delta$  ( $^1H$ )/  $\delta$  ( $^{13}C$ ) = 1.14/ 28.28, 28.40, 141.68, 142.14 ( $CH(CH_3)_2$ /  $CH(CH_3)_2$ ,  $CH(CH_3)_2$ , Ar-C, Ar-C), 1.72/ 96.71, 170.03 ( $Me$ /  $CH$ ,  $C=N$ ), 1.83/ 96.71, 165.00 ( $Me$ /  $CH$ ,  $C=N$ ), 5.02/ 23.21, 23.69, 165.00, 170.03 ( $CH$ /  $CH(CH_3)_2$ ,  $CH(CH_3)_2$ ,  $C=N$ ,  $C=N$ ), 6.45/ 107.71, 127.10 (Ar- $H^d$ / Ar-C, Ar-C), 6.91/ 133.61, 154.70 (Ar- $H^c$ / Ar- $CH^e$ , Ar-C), 7.00/ 144.01 (Ar- $H^b$ / Ar-C), 7.18/ 154.70 (Ar- $H^e$ / Ar-C).

**$^{19}F$  NMR** (564 MHz,  $C_6D_6$ , 299 K):  $\delta$  -162.09 (m, 2F, m- $C_6F_5$ ), -156.17 (m, 1F, p- $C_6F_5$ ), -115.41 (m, 2F, o- $C_6F_5$ ) ppm.

**DPFNOE** (600 MHz,  $C_6D_6$ , 299 K):  $\delta$  ( $^1H_{ir}$ ) /  $\delta$  ( $^1H_{res}$ ) = 1.14/ 1.72 ( $CH(CH_3)_2$ /  $Me$ ), 1.72/ 1.14, 5.02 ( $Me$ /  $CH(CH_3)_2$ ,  $CH$ ), 5.02/ 1.72, 1.83 ( $CH$ /  $Me$ ,  $Me$ ), 6.45/ 7.18 (Ar- $H^d$ / Ar- $H^e$ ), 6.91/ 7.00 (Ar- $H^c$ / Ar- $H^b$ ).

**1D TOCSY** (600 MHz,  $C_6D_6$ , 299 K):  $\delta$  ( $^1H_{ir}$ ) /  $\delta$  ( $^1H_{res}$ ) = 1.14/ 1.23, 1.36, 3.31, 3.45 ( $CH(CH_3)_2$ /  $CH(CH_3)_2$ ,  $CH(CH_3)_2$ ,  $CH(CH_3)_2$ ,  $CH(CH_3)_2$ ), 6.45/ 6.91, 7.00, 7.18 (Ar- $H^d$ / Ar- $H^c$ , Ar- $H^b$ , Ar- $H^e$ ), 6.91/ 6.45, 7.00, 7.18 (Ar- $H^c$ / Ar- $H^d$ , Ar- $H^b$ , Ar- $H^e$ ).

**IR (KBr)**:  $\nu/cm^{-1}$  = 2249 ( $\nu$  ( $C\equiv N$ ), s).

**HRMS (ESI +  $H^+$ )**:  $m/z$  calculated (for  $(C_{30}H_{28}F_5N_3Zn)(C_{24}H_{30}N_3)$ ): 949.3929 Found: 949.3931.

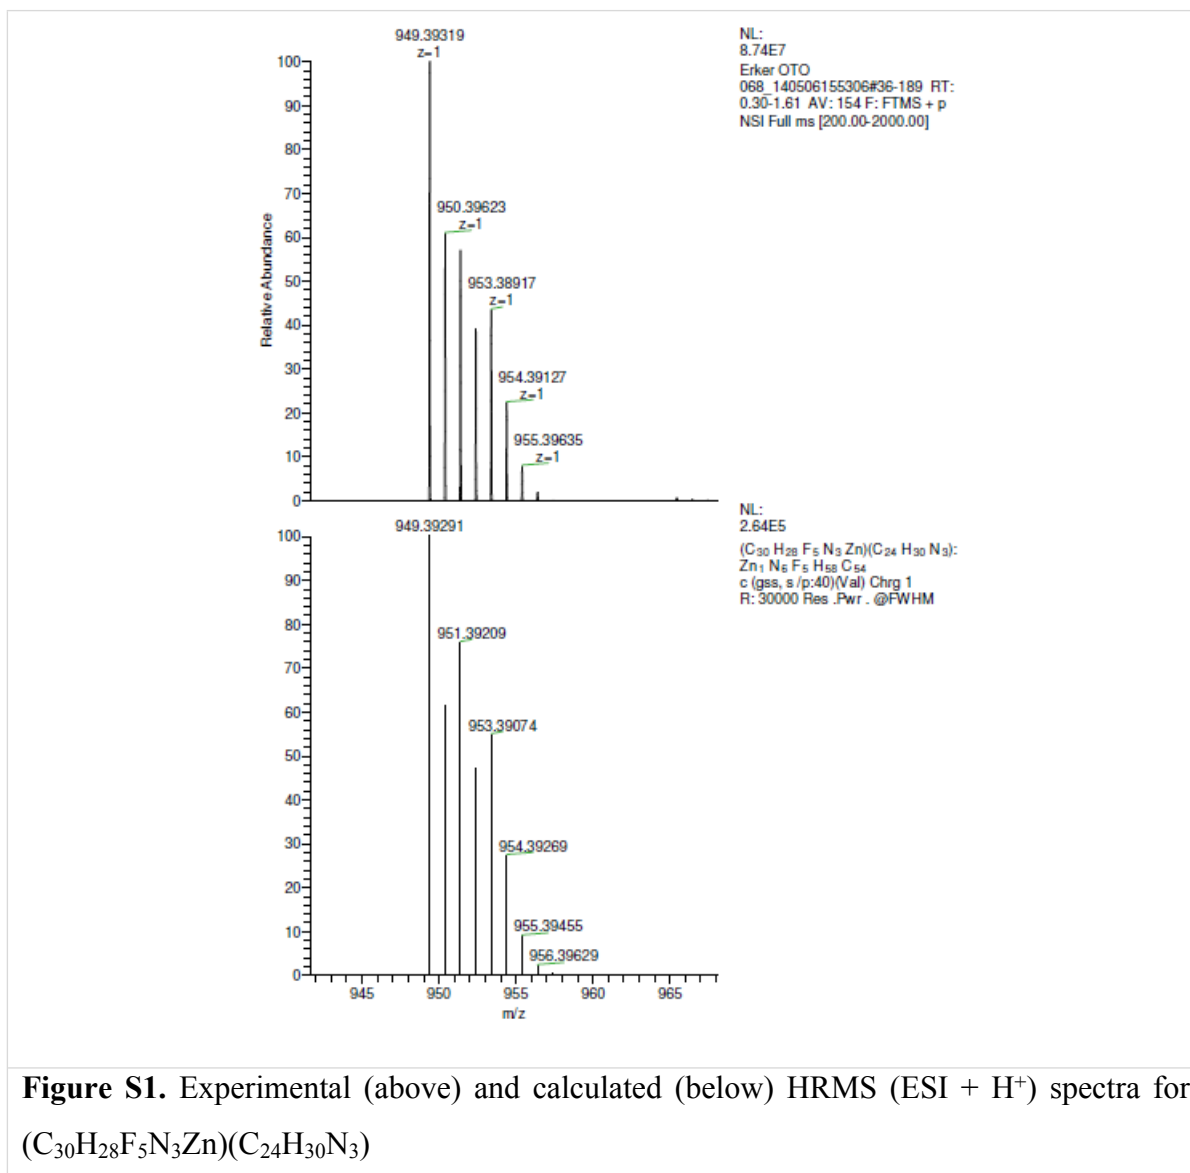

### Preparation of $ZnL_1C_6F_5^* B(C_6F_5)_3$ , **6**.

1 eq of Tris(pentafluorophenyl)borane (33.8 mg in 1 mL of toluene, 66 mmol) was added to a toluene solution of **5** (40 mg, 66 mmol). The reaction mixture was stirred for 20 min, filtered, washed with 3 ml cold pentane and dried under vacuum. Compound **6** was isolated as orange solid in 73 % yield.

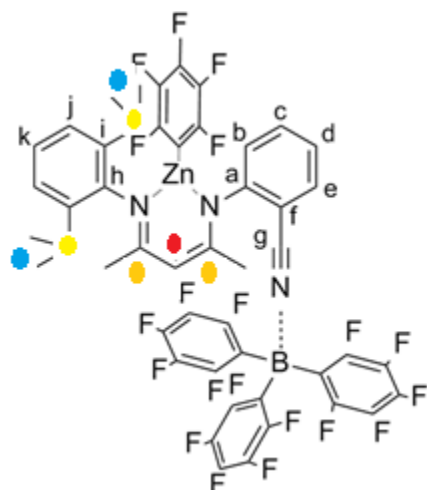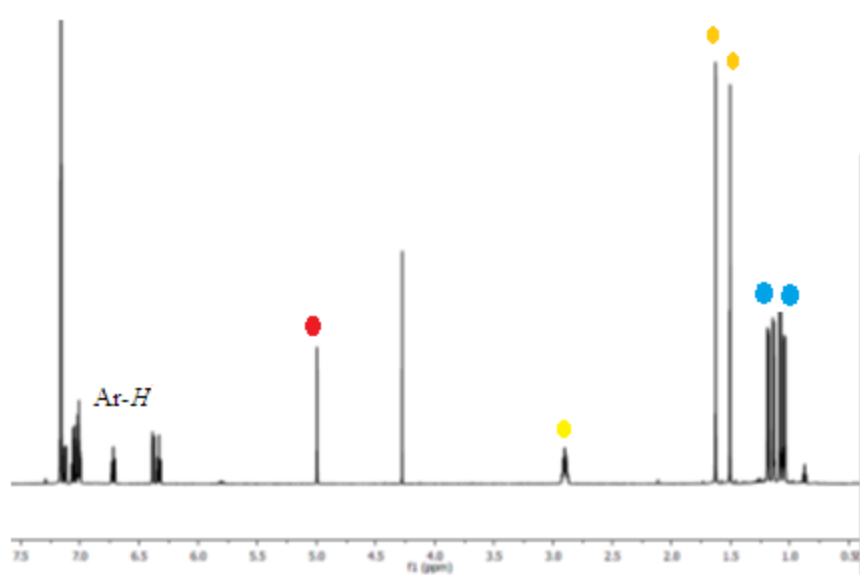

**$^1\text{H}$  NMR (600 MHz,  $\text{C}_6\text{D}_6$ , 299 K)**

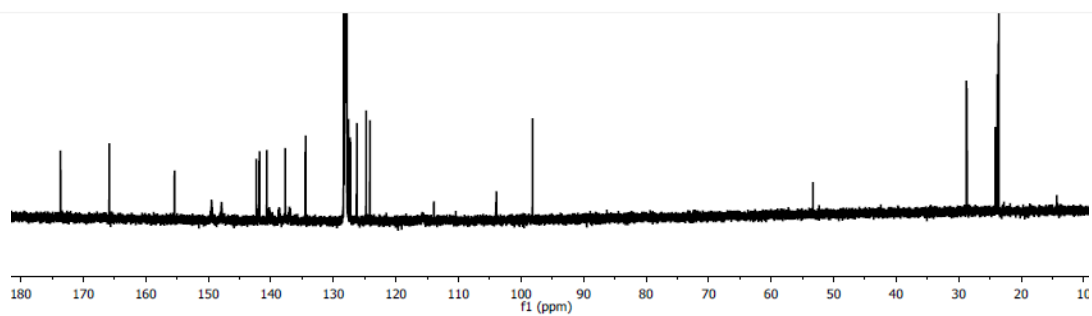

**$^{13}\text{C}$  { $^1\text{H}$ } (100 MHz,  $\text{C}_6\text{D}_6$ , 299 K)**



**<sup>1</sup>H NMR** (600 MHz, C<sub>6</sub>D<sub>6</sub>, 299 K): δ/ppm = 1.05 (d, J = 1.05 Hz, 3H, CH(CH<sub>3</sub>)<sub>2</sub>), 1.09 (d, J = 1.08 Hz, 3H, CH(CH<sub>3</sub>)<sub>2</sub>), 1.14 (d, J = 1.14 Hz, 3H, CH(CH<sub>3</sub>)<sub>2</sub>), 1.19 (d, J = 1.18 Hz, 3H, CH(CH<sub>3</sub>)<sub>2</sub>), 1.51 (s, 3H, *Me*), 1.63 (s, 3H, *Me*), 2.90 (s, 1H, CH(CH<sub>3</sub>)<sub>2</sub>), 5.00 (s, 1H, *CH*), 6.33 (t, 1H, Ar-*H<sup>d</sup>*), 6.39 (d, 1H, Ar-*H<sup>b</sup>*), 6.72 (t, 1H, Ar-*H<sup>c</sup>*), 7.00 (m, 2H, Ar-*H<sup>j</sup>*), 7.04 (m, 1H, Ar-*H<sup>k</sup>*), 7.12 (d, 1H, Ar-*H<sup>e</sup>*).

**<sup>13</sup>C {<sup>1</sup>H} NMR** (100 MHz, C<sub>6</sub>D<sub>6</sub>, 299 K): δ/ppm = 23.58 (*Me*), 23.60 (CH(CH<sub>3</sub>)<sub>2</sub>), 23.65 (CH(CH<sub>3</sub>)<sub>2</sub>), 23.82 (CH(CH<sub>3</sub>)<sub>2</sub>), 24.11 (CH(CH<sub>3</sub>)<sub>2</sub>), 28.67 (CH(CH<sub>3</sub>)<sub>2</sub>), 28.78 (CH(CH<sub>3</sub>)<sub>2</sub>), 98.16 (CH), 103.95 (Ar-*C<sup>f</sup>*), 113.94 (C≡N), 124.17 (Ar-*CH<sup>i</sup>*), 124.78 (Ar-*CH<sup>j</sup>*), 126.27 (Ar-*CH<sup>d</sup>*), 127.30 (Ar-*CH<sup>k</sup>*), 127.59 (Ar-*CH<sup>b</sup>*), 134.45 (Ar-*CH<sup>e</sup>*), 137.01 (Ar<sup>F5</sup>-C), 137.71 (Ar-*CH<sup>c</sup>*), 138.65 (Ar<sup>F5</sup>-C), 140.24 (Ar<sup>F5</sup>-C), 140.65 (Ar-*C<sup>i</sup>*), 141.84 (Ar-*C<sup>i</sup>*), 141.89 (Ar<sup>F5</sup>-C), 142.31 (Ar-*C<sup>h</sup>*), 147.97 (Ar<sup>F5</sup>-C), 149.44 (Ar<sup>F5</sup>-C), 155.45 (Ar-*C<sup>a</sup>*), 165.89 (C=N), 173.69 (C=N).

**<sup>1</sup>H-<sup>1</sup>H GCOSY** (600 MHz / 600 MHz, C<sub>6</sub>D<sub>6</sub>, 299 K): δ (<sup>1</sup>H)/ δ (<sup>1</sup>H) = 1.05/ 2.90 (CH(CH<sub>3</sub>)<sub>2</sub>/ CH(CH<sub>3</sub>)<sub>2</sub>), 1.09/ 2.90 (CH(CH<sub>3</sub>)<sub>2</sub>/ CH(CH<sub>3</sub>)<sub>2</sub>), 1.14/ 2.90 (CH(CH<sub>3</sub>)<sub>2</sub>/ CH(CH<sub>3</sub>)<sub>2</sub>), 1.19/ 2.90 (CH(CH<sub>3</sub>)<sub>2</sub>/ CH(CH<sub>3</sub>)<sub>2</sub>), 1.51/ 5.00 (*Me*/ *CH*), 2.90/ 1.05, 1.09, 1.14, 1.19, (CH(CH<sub>3</sub>)<sub>2</sub>/ CH(CH<sub>3</sub>)<sub>2</sub>, CH(CH<sub>3</sub>)<sub>2</sub>, CH(CH<sub>3</sub>)<sub>2</sub>, CH(CH<sub>3</sub>)<sub>2</sub>), 5.00/ 1.51, 1.63 (*CH*/ *Me*, *Me*), 6.33/ 6.72, 7.12 (Ar-*H<sup>d</sup>*/ Ar-*H<sup>c</sup>*, Ar-*H<sup>e</sup>*), 6.39/ 6.72, 7.12 (Ar-*H<sup>b</sup>*/ Ar-*H<sup>c</sup>*, Ar-*H<sup>e</sup>*), 6.72/ 6.33, 6.39, 7.12 (Ar-*H<sup>c</sup>*/ Ar-*H<sup>d</sup>*, Ar-*H<sup>b</sup>*, Ar-*H<sup>e</sup>*), 7.00/ 7.04 (Ar-*H<sup>j</sup>*/ Ar-*H<sup>k</sup>*), 7.04/ 7.00 (Ar-*H<sup>k</sup>*/ Ar-*H<sup>j</sup>*), 7.12/ 6.33 (Ar-*H<sup>e</sup>*/ Ar-*H<sup>d</sup>*).

**<sup>13</sup>C-GHSQC** (600 MHz / 100 MHz, C<sub>6</sub>D<sub>6</sub>, 299 K): δ (<sup>1</sup>H)/ δ (<sup>13</sup>C) = 1.05/ 23.60 (CH(CH<sub>3</sub>)<sub>2</sub>/ CH(CH<sub>3</sub>)<sub>2</sub>), 1.09/ 23.65 (CH(CH<sub>3</sub>)<sub>2</sub>/ CH(CH<sub>3</sub>)<sub>2</sub>), 1.14/ 23.82 (CH(CH<sub>3</sub>)<sub>2</sub>/ CH(CH<sub>3</sub>)<sub>2</sub>), 1.19/ 24.11 (CH(CH<sub>3</sub>)<sub>2</sub>/ CH(CH<sub>3</sub>)<sub>2</sub>), 1.51/ 23.58 (*Me*/ CH<sub>3</sub>), 1.63/ 23.58 (*Me*/ CH<sub>3</sub>), 2.90/ 28.67, 28.78 (CH(CH<sub>3</sub>)<sub>2</sub>/ CH(CH<sub>3</sub>)<sub>2</sub>, CH(CH<sub>3</sub>)<sub>2</sub>), 5.00/ 98.16 (*CH*/ CH), 6.33/ 126.27 (Ar-*H<sup>d</sup>*/ Ar-*CH<sup>d</sup>*), 6.39/ 127.59 (Ar-*H<sup>b</sup>*/ Ar-*CH<sup>b</sup>*), 6.72/ 137.71 (Ar-*H<sup>c</sup>*/ Ar-*CH<sup>c</sup>*), 7.00/ 124.17, 124.78 (Ar-*H<sup>j</sup>*/ Ar-*CH<sup>j</sup>*, Ar-*CH<sup>j</sup>*), 7.04/ 127.30 (Ar-*H<sup>k</sup>*/ Ar-*CH<sup>k</sup>*), 7.12/ 134.45 (Ar-*H<sup>e</sup>*/ Ar-*CH<sup>e</sup>*).

**<sup>1</sup>H, <sup>13</sup>C-GHMQC** (600 MHz / 100 MHz, C<sub>6</sub>D<sub>6</sub>, 299 K): δ (<sup>1</sup>H)/ δ (<sup>13</sup>C) = 1.05/ 23.60, 28.67, 28.78, 141.84 (CH(CH<sub>3</sub>)<sub>2</sub>/ CH(CH<sub>3</sub>)<sub>2</sub>, CH(CH<sub>3</sub>)<sub>2</sub>, CH(CH<sub>3</sub>)<sub>2</sub>, Ar-*C<sup>i</sup>*), 1.09/ 23.65, 28.67, 28.78, 140.65 (CH(CH<sub>3</sub>)<sub>2</sub>/ CH(CH<sub>3</sub>)<sub>2</sub>, CH(CH<sub>3</sub>)<sub>2</sub>, CH(CH<sub>3</sub>)<sub>2</sub>, Ar-*C<sup>i</sup>*), 1.14/ 23.82, 28.67, 28.78, 141.84 (CH(CH<sub>3</sub>)<sub>2</sub>/ CH(CH<sub>3</sub>)<sub>2</sub>, CH(CH<sub>3</sub>)<sub>2</sub>, CH(CH<sub>3</sub>)<sub>2</sub>, Ar-*C<sup>i</sup>*), 1.19/ 24.11, 28.67, 28.78, 140.65 (CH(CH<sub>3</sub>)<sub>2</sub>/ CH(CH<sub>3</sub>)<sub>2</sub>, CH(CH<sub>3</sub>)<sub>2</sub>, CH(CH<sub>3</sub>)<sub>2</sub>, Ar-*C<sup>i</sup>*), 1.51/ 98.16,

165.89 (*Me*/ CH, C=N), 1.63/ 98.16, 173.69 (*Me*/ CH, C=N), 2.90/ 23.60, 23.65, 23.82, 24.11, 124.17, 124.78, 140.65, 141.84, 142.31 (CH(CH<sub>3</sub>)<sub>2</sub>/ CH(CH<sub>3</sub>)<sub>2</sub>, CH(CH<sub>3</sub>)<sub>2</sub>, CH(CH<sub>3</sub>)<sub>2</sub>, CH(CH<sub>3</sub>)<sub>2</sub>, Ar-CH<sup>*i*</sup>, Ar-CH<sup>*j*</sup>, Ar-C<sup>*i*</sup>, Ar-C<sup>*j*</sup>, Ar-C<sup>*h*</sup>), 5.00/ 23.58, 141.84, 142.31, 155.45, 165.89, 173.69 (CH/ *Me*, Ar-C<sup>*i*</sup>, Ar-C<sup>*h*</sup>, Ar-C<sup>*a*</sup>, C=N, C=N), 6.33/ 103.95, 134.45 (Ar-H<sup>*d*</sup>/ Ar-C<sup>*f*</sup>, Ar-CH<sup>*e*</sup>), 6.39/ 103.95 (Ar-H<sup>*b*</sup>/ Ar-C<sup>*f*</sup>), 6.72/ 134.45, 155.45 (Ar-H<sup>*c*</sup>/ Ar-CH<sup>*e*</sup>, Ar-C<sup>*a*</sup>), 7.00/ 28.67, 28.78, 124.17, 124.78, 141.84, 142.31 (Ar-H<sup>*j*</sup>/ CH(CH<sub>3</sub>)<sub>2</sub>, CH(CH<sub>3</sub>)<sub>2</sub>, Ar-CH<sup>*i*</sup>, Ar-CH<sup>*j*</sup>, Ar-C<sup>*i*</sup>, Ar-C<sup>*h*</sup>), 7.04/ 140.65 (Ar-H<sup>*k*</sup>/ Ar-C<sup>*i*</sup>), 7.12/ 113.94, 137.71, 155.45 (Ar-H<sup>*e*</sup>/ C≡N, Ar-CH<sup>*c*</sup>, Ar-C<sup>*a*</sup>).

**DPFGNOE** (600 MHz, C<sub>6</sub>D<sub>6</sub>, 299 K): δ (<sup>1</sup>H<sub>ir</sub>) / δ (<sup>1</sup>H<sub>res</sub>) = 1.05/ 1.09, 1.19, 2.90, 7.00 (CH(CH<sub>3</sub>)<sub>2</sub>/ CH(CH<sub>3</sub>)<sub>2</sub>, CH(CH<sub>3</sub>)<sub>2</sub>, CH(CH<sub>3</sub>)<sub>2</sub>, Ar-H<sup>*j*</sup>), 1.09/ 1.05, 1.14, 2.90, 7.00 (CH(CH<sub>3</sub>)<sub>2</sub>/ CH(CH<sub>3</sub>)<sub>2</sub>, CH(CH<sub>3</sub>)<sub>2</sub>, CH(CH<sub>3</sub>)<sub>2</sub>, Ar-H<sup>*j*</sup>), 1.14/ 1.09, 2.90, 7.00 (CH(CH<sub>3</sub>)<sub>2</sub>/ CH(CH<sub>3</sub>)<sub>2</sub>, CH(CH<sub>3</sub>)<sub>2</sub>, Ar-H<sup>*j*</sup>), 1.19/ 1.05, 2.90, 7.00 (CH(CH<sub>3</sub>)<sub>2</sub>/ CH(CH<sub>3</sub>)<sub>2</sub>, CH(CH<sub>3</sub>)<sub>2</sub>, Ar-H<sup>*j*</sup>), 1.51/ 2.90, 6.33 (*Me*/ CH(CH<sub>3</sub>)<sub>2</sub>, Ar-H<sup>*j*</sup>), 1.63/ 1.09, 1.14, 1.19 (*Me*/ CH(CH<sub>3</sub>)<sub>2</sub>, CH(CH<sub>3</sub>)<sub>2</sub>, CH(CH<sub>3</sub>)<sub>2</sub>), 2.90/ 1.05, 1.09, 1.14, 1.19, 1.63 (CH(CH<sub>3</sub>)<sub>2</sub>/ CH(CH<sub>3</sub>)<sub>2</sub>, CH(CH<sub>3</sub>)<sub>2</sub>, CH(CH<sub>3</sub>)<sub>2</sub>, CH(CH<sub>3</sub>)<sub>2</sub>, *Me*), 5.00/ 1.63 (CH/ *Me*), 6.33/ 6.39, 6.72, 7.12 (Ar-H<sup>*d*</sup>/ Ar-H<sup>*b*</sup>, Ar-H<sup>*c*</sup>, Ar-H<sup>*e*</sup>), 6.39/ 6.33, 6.72, 7.12 (Ar-H<sup>*b*</sup>/ Ar-H<sup>*d*</sup>, Ar-H<sup>*c*</sup>, Ar-H<sup>*e*</sup>), 6.72/ 6.33, 6.39, 7.12 (Ar-H<sup>*c*</sup>/ Ar-H<sup>*d*</sup>, Ar-H<sup>*b*</sup>, Ar-H<sup>*e*</sup>), 7.00/ 7.04 (Ar-H<sup>*j*</sup>/ Ar-H<sup>*k*</sup>), 7.04/ 7.00 (Ar-H<sup>*k*</sup>/ Ar-H<sup>*j*</sup>), 7.12/ 6.33, 6.39, 6.72 (Ar-H<sup>*e*</sup>/ Ar-H<sup>*d*</sup>, Ar-H<sup>*b*</sup>, Ar-H<sup>*c*</sup>).

**1D TOCSY** (600 MHz, C<sub>6</sub>D<sub>6</sub>, 299 K): δ (<sup>1</sup>H<sub>ir</sub>) / δ (<sup>1</sup>H<sub>res</sub>) = 1.05/ 1.09, 1.14, 1.19, 2.90 (CH(CH<sub>3</sub>)<sub>2</sub>/ CH(CH<sub>3</sub>)<sub>2</sub>, CH(CH<sub>3</sub>)<sub>2</sub>, CH(CH<sub>3</sub>)<sub>2</sub>, CH(CH<sub>3</sub>)<sub>2</sub>), 1.09/ 1.05, 1.14, 1.19, 2.90 (CH(CH<sub>3</sub>)<sub>2</sub>/ CH(CH<sub>3</sub>)<sub>2</sub>, CH(CH<sub>3</sub>)<sub>2</sub>, CH(CH<sub>3</sub>)<sub>2</sub>, CH(CH<sub>3</sub>)<sub>2</sub>), 1.14/ 1.05, 1.14, 1.19, 2.90 (CH(CH<sub>3</sub>)<sub>2</sub>/ CH(CH<sub>3</sub>)<sub>2</sub>, CH(CH<sub>3</sub>)<sub>2</sub>, CH(CH<sub>3</sub>)<sub>2</sub>, CH(CH<sub>3</sub>)<sub>2</sub>), 1.19/ 1.05, 1.14, 1.19, 2.90 (CH(CH<sub>3</sub>)<sub>2</sub>/ CH(CH<sub>3</sub>)<sub>2</sub>, CH(CH<sub>3</sub>)<sub>2</sub>, CH(CH<sub>3</sub>)<sub>2</sub>, CH(CH<sub>3</sub>)<sub>2</sub>), 2.90/ 1.05, 1.09, 1.14, 1.19 (CH(CH<sub>3</sub>)<sub>2</sub>/ CH(CH<sub>3</sub>)<sub>2</sub>, CH(CH<sub>3</sub>)<sub>2</sub>, CH(CH<sub>3</sub>)<sub>2</sub>, CH(CH<sub>3</sub>)<sub>2</sub>), 5.00/ 1.51, 1.63 (CH/ *Me*, *Me*), 6.33/ 6.72 (Ar-H<sup>*d*</sup>/ Ar-H<sup>*c*</sup>), 6.39/ 6.33 (Ar-H<sup>*b*</sup>/ Ar-H<sup>*d*</sup>), 6.72/ 6.33, 6.39 (Ar-H<sup>*c*</sup>/ Ar-H<sup>*d*</sup>, Ar-H<sup>*b*</sup>), 7.00/ 7.04 (Ar-H<sup>*j*</sup>/ Ar-H<sup>*k*</sup>), 7.04/ 7.00 (Ar-H<sup>*k*</sup>/ Ar-H<sup>*j*</sup>), 7.12/ 6.33 (Ar-H<sup>*e*</sup>/ Ar-H<sup>*c*</sup>).

**<sup>19</sup>F NMR** (564 MHz, C<sub>6</sub>D<sub>6</sub>, 299 K): δ -162.75 (m, 6F, m-C<sub>6</sub>F<sub>5</sub>), -160.86 (m, 2F, m-C<sub>6</sub>F<sub>5</sub>), -155.54 (m, 3F, p-C<sub>6</sub>F<sub>5</sub>), -153.19 (m, 1F, p-C<sub>6</sub>F<sub>5</sub>), -134.23 (m, 6F, o-C<sub>6</sub>F<sub>5</sub>), -116.72 (m, 2F, o-C<sub>6</sub>F<sub>5</sub>) ppm.

**<sup>19</sup>F-<sup>19</sup>F GCOSY** (564 MHz / 564 MHz, C<sub>6</sub>D<sub>6</sub>, 299 K): δ (<sup>19</sup>F)/ δ (<sup>19</sup>F) = -162.75/ -155.54, -134.23 (m-C<sub>6</sub>F<sub>5</sub>/ p-C<sub>6</sub>F<sub>5</sub>, o-C<sub>6</sub>F<sub>5</sub>), -160.86/ -153.19, -116.72 (m-C<sub>6</sub>F<sub>5</sub>/ p-C<sub>6</sub>F<sub>5</sub>, o-C<sub>6</sub>F<sub>5</sub>), -

155.54/ -162.75, 134.23 (p-C<sub>6</sub>F<sub>5</sub>/ m-C<sub>6</sub>F<sub>5</sub>, o-C<sub>6</sub>F<sub>5</sub>), -153.19/ -160.86, -116.72 (p-C<sub>6</sub>F<sub>5</sub>/ m-C<sub>6</sub>F<sub>5</sub>, o-C<sub>6</sub>F<sub>5</sub>), -134.23/ -162.75, -155.54 (o-C<sub>6</sub>F<sub>5</sub>/ m-C<sub>6</sub>F<sub>5</sub>, p-C<sub>6</sub>F<sub>5</sub>), -116.72/ -160.86, -153.19 (o-C<sub>6</sub>F<sub>5</sub>/ m-C<sub>6</sub>F<sub>5</sub>, p-C<sub>6</sub>F<sub>5</sub>) ppm.

<sup>11</sup>B NMR (192 MHz, C<sub>6</sub>D<sub>6</sub>, 299 K): δ -9.52 ppm.

IR (KBr): ν/cm<sup>-1</sup> = 2319 (ν (C≡N), s).

**Elemental analysis** (%) C<sub>48</sub>H<sub>28</sub>BF<sub>20</sub>N<sub>3</sub>Zn \* 0.5 C<sub>5</sub>H<sub>12</sub> : calculated C 53.25 H 3.01, N 3.69; found C 53.44, H 2.75, N 3.98.

### Preparation of ZnL<sub>2</sub>, 7.

Diketimine L<sub>2</sub>H (40 mg, 133.2 μmol) and Zn{N(SiMe<sub>3</sub>)<sub>2</sub>}<sub>2</sub> (34.2 mg, 88.8 μmol) were reacted in toluene (5 ml) for 12 hours at 80 °C. The residue obtained after evaporation of the solvent was washed with pentane and dried under vacuum to yield yellow powder of **7** (36.5 mg, 62 %). Single crystals for X-ray crystallography were grown by layering pentane onto a toluene solution of compound (**7**) at -30 °C.

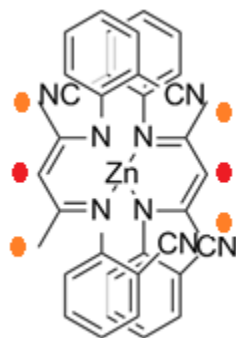

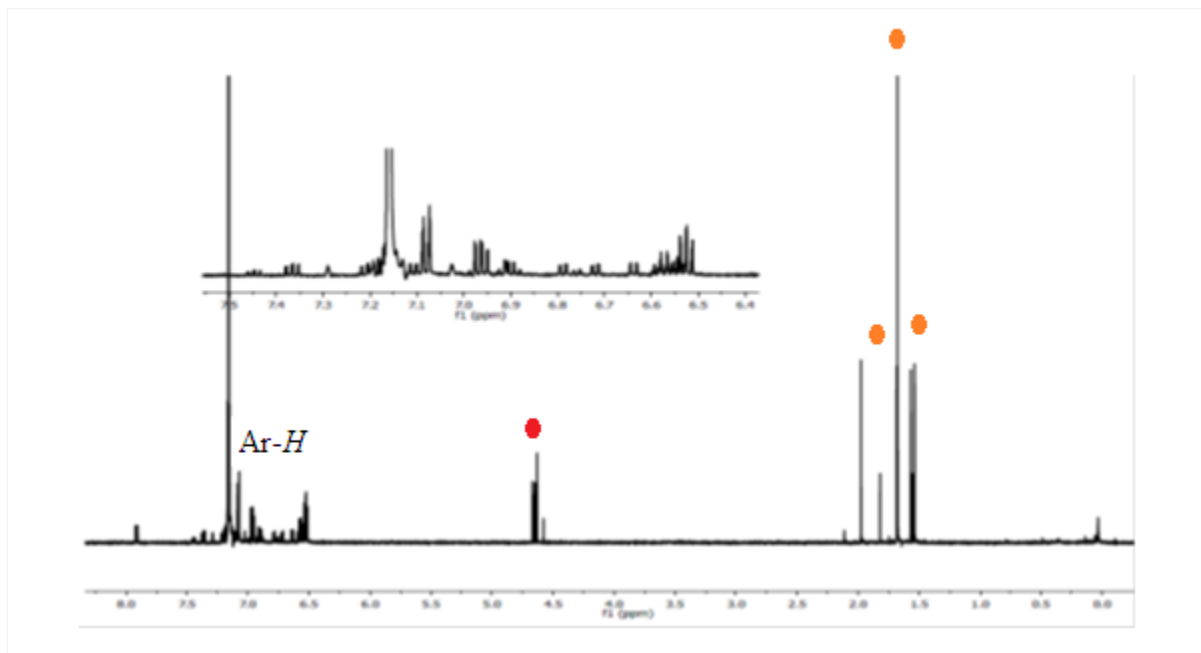

**<sup>1</sup>H NMR (600 MHz, C<sub>6</sub>D<sub>6</sub>, 299 K)**

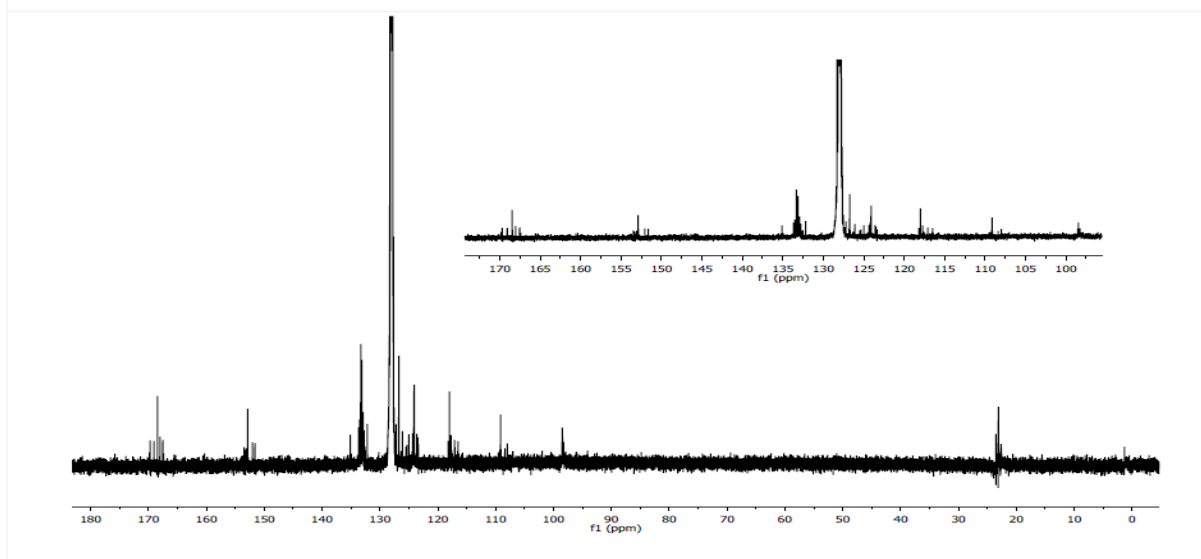

**<sup>13</sup>C {<sup>1</sup>H} (100 MHz, C<sub>6</sub>D<sub>6</sub>, 299 K)**

**<sup>1</sup>H NMR** (600 MHz, C<sub>6</sub>D<sub>6</sub>, 299 K):  $\delta$ /ppm = 1.54 (s, 6H, *Me*), 1.55 (s, 3H, *Me*), 1.57 (s, 6H, *Me*), 1.68 (s, 18H, *Me*), 1.69 (s, 6H, *Me*), 1.82 (s, 3H, *Me*), 1.98 (s, 6H, *Me*), 4.58 (s, 1H, *CH*), 4.63 (s, 3H, *CH*), 4.65 (s, 2H, *CH*), 4.67 (s, 2H, *CH*), 6.51 (m, 2H, *Ar-H*), 6.53 (m, 3H, *Ar-H*), 6.54 (m, 3H, *Ar-H*), 6.55 (m, 1H, *Ar-H*), 6.56 (m, 4H, *Ar-H*), 6.58 (m, 2H, *Ar-H*), 6.59 (m, 1H, *Ar-H*), 6.63 (m, 1H, *Ar-H*), 6.64 (m, 1H, *Ar-H*), 6.71 (m, 1H, *Ar-H*), 6.72 (m, 1H, *Ar-H*), 6.75 (m, 1H, *Ar-H*), 6.76 (m, 1H, *Ar-H*), 6.78 (m, 1H, *Ar-H*), 6.79 (m,

1H, Ar-H), 6.88 (m, 1H, Ar-H), 6.90 (m, 1H, Ar-H), 6.91 (m, 1H, Ar-H), 6.92 (m, 1H, Ar-H), 6.95 (m, 1H, Ar-H), 6.96 (m, 3H, Ar-H), 6.98 (m, 2H, Ar-H), 7.02 (m, 2H, Ar-H), 7.07 (m, 5H, Ar-H), 7.09 (m, 5H, Ar-H), 7.10 (m, 1H, Ar-H), 7.11 (m, 1H, Ar-H), 7.13 (m, 2H, Ar-H), 7.15 (m, 2H, Ar-H), 7.17 (m, 2H, Ar-H), 7.18 (m, 1H, Ar-H), 7.19 (m, 1H, Ar-H), 7.21 (m, 1H, Ar-H), 7.22 (m, 1H, Ar-H), 7.29 (m, 2H, Ar-H), 7.37 (m, 1H, Ar-H), 7.45 (m, 1H, Ar-H), 7.91 (m, 2H, Ar-H).

<sup>13</sup>C {<sup>1</sup>H} NMR (100 MHz, C<sub>6</sub>D<sub>6</sub>, 299 K): δ/ppm = 22.66 (Me), 22.71 (Me), 23.12 (Me), 23.45 (Me), 23.52 (Me), 98.27 (CH), 98.45 (CH), 98.52 (CH), 98.53 (CH), 107.99 (Ar-C), 108.39 (Ar-C), 108.40 (Ar-C), 109.13 (Ar-C), 109.19 (Ar-C), 116.48 (C≡N), 117.08 (C≡N), 117.6 (C≡N), 117.72 (C≡N), 118.00 (C≡N), 118.20 (C≡N), 123.35 (Ar), 123.48 (Ar-CH), 123.61 (Ar), 124.09 (Ar-CH), 124.18 (Ar), 124.24 (Ar), 124.35 (Ar), 125.00 (Ar-CH), 125.34 (Ar), 125.51 (Ar), 126.11 (Ar), 126.72 (Ar-CH), 126.78 (Ar), 127.21 (Ar), 132.17 (Ar-CH), 132.55 (Ar), 132.76 (Ar), 132.87 (Ar), 132.92 (Ar), 132.97 (Ar), 133.01 (Ar), 133.06 (Ar), 133.14 (Ar-CH), 133.32 (Ar-CH), 133.53 (Ar), 133.64 (Ar), 133.68 (Ar-CH), 135.12 (Ar), 151.62 (Ar), 152.07 (Ar), 152.88 (Ar), 153.05 (Ar), 153.29 (Ar), 153.48 (Ar), 167.39 (C=N), 167.53 (C=N), 168.04 (C=N), 168.45 (C=N), 169.07 (C=N), 169.71 (C=N), 169.84 (C=N).

**GCOSY** (600 MHz / 600 MHz, C<sub>6</sub>D<sub>6</sub>, 299 K): δ (<sup>1</sup>H)/ δ (<sup>1</sup>H) = 6.51/ 6.95, 6.96, 6.98, 7.07, 7.09 (Ar-H/ Ar-H, Ar-H, Ar-H, Ar-H), 6.55/ 6.78, 6.79 (Ar-H/ Ar-H, Ar-H), 6.56/ 6.71, 6.72 (Ar-H/ Ar-H, Ar-H), 6.58/ 7.18 (Ar-H/ Ar-H), 6.59/ 7.18 (Ar-H/ Ar-H), 6.63/ 7.22 (Ar-H/ Ar-H), 6.64/ 7.22 (Ar-H/ Ar-H), 6.71/ 6.53, 6.55, 6.56 (Ar-H/ Ar-H, Ar-H, Ar-H), 6.78/ 6.54, 6.58 (Ar-H/ Ar-H, Ar-H), 6.90/ 6.51, 6.54 (Ar-H/ Ar-H, Ar-H), 6.95/ 6.51, 6.54, 7.07, 7.09 (Ar-H/ Ar-H, Ar-H, Ar-H, Ar-H), 6.98/ 6.51, 6.54, 7.07, 7.09 (Ar-H/ Ar-H, Ar-H, Ar-H, Ar-H), 7.07/ 6.51, 6.54, 6.95, 6.98 (Ar-H/ Ar-H, Ar-H, Ar-H, Ar-H), 7.09/ 6.51, 6.54, 6.95, 6.98 (Ar-H/ Ar-H, Ar-H, Ar-H, Ar-H), 7.13/ 7.45 (Ar-H/ Ar-H), 7.17/ 6.56 (Ar-H/ Ar-H), 7.18/ 6.59, 7.91 (Ar-H/ Ar-H, Ar-H), 7.19/ 6.54 (Ar-H/ Ar-H), 7.22/ 6.54, 6.58, 6.63, 6.64 (Ar-H/ Ar-H, Ar-H, Ar-H, Ar-H), 7.45/ 7.13 (Ar-H/ Ar-H), 7.91/ 7.15, 7.18 (Ar-H/ Ar-H, Ar-H).

**<sup>13</sup>C-GHSQC** (600 MHz / 100 MHz, C<sub>6</sub>D<sub>6</sub>, 299 K): δ (<sup>1</sup>H)/ δ (<sup>13</sup>C) = 1.68/ 23.12 (Me/ Me), 1.68/ 23.45 (Me/ Me), 1.68/ 23.52 (Me/ Me), 4.63/ 98.27 (CH/ CH), 4.65/ 98.45 (CH/ CH), 4.67/ 98.52 (CH/ CH), 6.51/ 123.48, 125.00 (Ar-H/ Ar-CH, Ar-CH), 6.53/ 124.09 (Ar-H/

Ar-CH), 6.58/ 125.00 (Ar-H/ Ar-CH), 6.95/ 126.72 (Ar-H/ Ar-CH), 6.96/ 133.14, 133.32 (Ar-H/ Ar-CH, Ar-CH), 7.07/ 132.17, 133.68 (Ar-H/ Ar-CH, Ar-CH).

**<sup>1</sup>H, <sup>13</sup>C-GHMQC** (600 MHz / 100 MHz, C<sub>6</sub>D<sub>6</sub>, 299 K): δ (<sup>1</sup>H)/ δ (<sup>13</sup>C) = 4.63/ 22.66, 22.7, 98.45 (CH/ Me, Me, CH), 7.17/ 98.45 (Ar-H/ CH).

**DPFGNOE** (600 MHz, C<sub>6</sub>D<sub>6</sub>, 299 K): δ (<sup>1</sup>H<sub>ir</sub>) / δ (<sup>1</sup>H<sub>res</sub>) = 1.54/ 1.55, 1.57 (Me/ Me, Me), 1.55/ 1.54, 1.57 (Me/ Me, Me), 1.57/ 1.54, 1.55 (Me/ Me, Me), 1.68/ 1.69, 4.63 (Me/ Me, Me), 1.69/ 1.68, 4.63 (Me/ Me, CH), 4.63/ 1.68, 4.65, 4.67 (CH/ Me, CH, CH), 4.65/ 1.68, 4.63, 4.67 (CH/ Me, CH, CH), 4.67/ 1.68, 4.63, 4.65 (CH/ Me, CH, CH).

**1D TOCSY** (600 MHz, C<sub>6</sub>D<sub>6</sub>, 299 K): δ (<sup>1</sup>H<sub>ir</sub>) / δ (<sup>1</sup>H<sub>res</sub>) = 1.54/ 1.55, 1.57 (Me/ Me, Me), 1.55/ 1.54, 1.57 (Me/ Me, Me), 1.57/ 1.54, 1.55 (Me/ Me, Me), 1.68/ 1.69 (Me/ Me), 1.69/ 1.68 (Me/ Me), 4.63/ 4.65, 4.67 (CH/ CH, CH), 4.65/ 4.63, 4.67 (CH/ CH, CH), 4.67/ 4.63, 4.65 (CH/ CH, CH).

**IR (KBr):** ν/cm<sup>-1</sup> = 2226 (ν (C≡N), s).

**Elemental analysis (%)** (M = 662.1885 g/mol): calculated C 68.73, H 4.55, N 16.87; found C 68.42, H 4.25, N 16.52.

## 2. Zn<sub>2</sub>(L<sub>1</sub>)<sub>2</sub>(OH)<sub>2</sub> (**1<sup>a</sup>**)

**Zn<sub>2</sub>(L<sub>1</sub>)<sub>2</sub>(OH)<sub>2</sub> (**1<sup>a</sup>**).** Zinc amide complex **1** with a long stay in a toluene solution was spotted to decompose to bimetallic zinc complex Zn<sub>2</sub>(L<sub>1</sub>)<sub>2</sub>(OH)<sub>2</sub> (**1<sup>a</sup>**), single crystals of this compound suitable for X-ray diffraction were obtained, but only in quantities insufficient for further characterization.

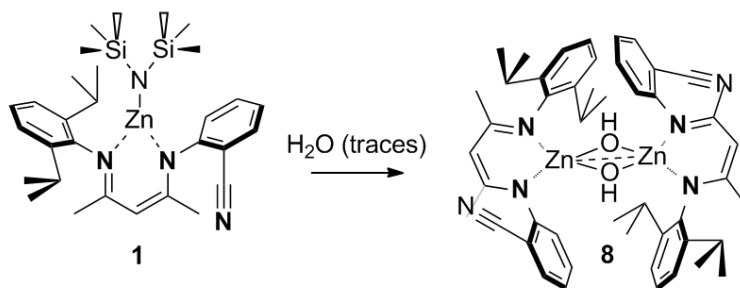

**Scheme S1.** Synthesis of Zn<sub>2</sub>(L<sub>1</sub>)<sub>2</sub>(OH)<sub>2</sub> (**1<sup>a</sup>**)

**1<sup>a</sup>** crystallizes in the triclinic space group *P* $\bar{1}$  as a hydroxide-bridged centrosymmetric dimer (Scheme S1, Figure S2). The Zn-O bond lengths are almost identical (Zn1-O1 1.969(1);

Zn1-O1\* 1.966(1) Å) as was previously observed for [MesnacnacZn( $\mu$ -OH)]<sub>2</sub>,<sup>1</sup> whereas terminal OH groups show shorter Zn-O bond lengths (1.85-1.90 Å).<sup>1</sup> The Zn<sub>2</sub>O<sub>2</sub> metallacycle in **1<sup>a</sup>** is planar (dihedral angle Zn1-O1-Zn1\*-O1\* is -0.0(1)°) with the Zn...Zn distance 3.002(1) Å, while in [MesnacnacZn( $\mu$ -OH)]<sub>2</sub> the distance between two atoms of zinc is 2.909 Å.<sup>1</sup> Zn-N bond lengths within the complex **1<sup>a</sup>** are slightly larger compared to the starting amide zinc complex **1** (Figure 1, Figure S2). Four-coordinate zinc **1<sup>a</sup>** adopts distorted tetrahedral geometry (O1-Zn1-N1 115.5(1)°, O1\*-Zn1-N2 121.1(1)°, N1-Zn1-N2 97.2(1)°).

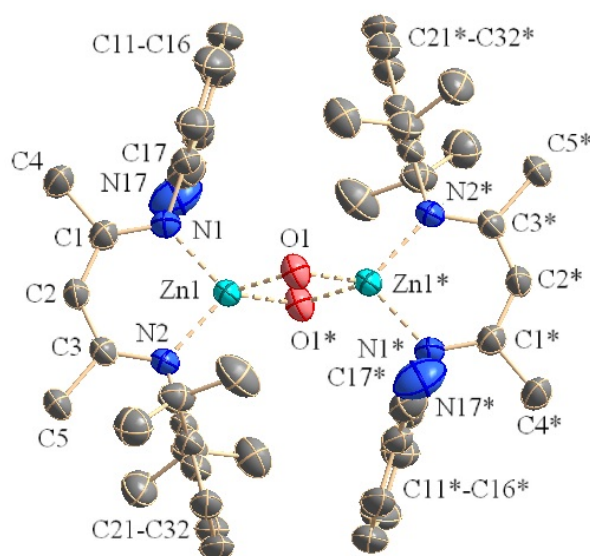

**Figure S2.** X-ray crystal structure of **1<sup>a</sup>** with thermal ellipsoids drawn at the 50 % probability level. The hydrogen atoms are omitted for clarity. Selected bond lengths (Å) and angles (deg): Zn1-O1 1.969(1), Zn1-O1\* 1.966(1), Zn1-Zn1\* 3.002(1), Zn1-N1 1.997(2), Zn1-N2 1.989(2), O1-O1\* 2.544(1), O1-Zn1-O1\* 80.6(1), N1-Zn1-N2 97.2(1), O1-Zn1-N1 115.5(1), O1\*-Zn1-N2 121.1(1), Zn1-O1-Zn1\*-O1\* -0.0(1).

### 3. Crystallography Characterization.

**X-Ray diffraction:** Data sets were collected with a Nonius KappaCCD diffractometer. Programs used: data collection, COLLECT (R. W. W. Hooft, Bruker AXS, 2008, Delft, The Netherlands); data reduction Denzo-SMN (Z. Otwinowski, W. Minor, *Methods Enzymol.* **1997**, 276, 307-326); absorption correction, Denzo (Z. Otwinowski, D. Borek, W. Majewski, W. Minor, *Acta Crystallogr.* **2003**, A59, 228-234); structure solution SHELXS-

97 (G. M. Sheldrick, *Acta Crystallogr.* **1990**, *A46*, 467-473); structure refinement SHELXL-97 (G. M. Sheldrick, *Acta Crystallogr.* **2008**, *A64*, 112-122) and graphics, XP (BrukerAXS, 2000). *R*-values are given for observed reflections, and *wR*<sup>2</sup> values are given for all reflections.

The crystal data and refinement of **1**, **1<sup>a</sup>**, **2**, **4**, **5** and **7** are summarized below.

**X-ray crystal structure analysis of 1 (erk7483):** formula C<sub>30</sub>H<sub>46</sub>N<sub>4</sub>Si<sub>2</sub>Zn, *M* = 584.26, pale yellow crystal, 0.14 x 0.11 x 0.03 mm, *a* = 10.6036(1), *b* = 17.0996(2), *c* = 19.1825(3) Å,  $\alpha$  = 71.047(1),  $\beta$  = 81.865(1),  $\gamma$  = 89.954(1)°, *V* = 3252.7(1) Å<sup>3</sup>,  $\rho_{\text{calc}}$  = 1.193 gcm<sup>-3</sup>,  $\mu$  = 0.852 mm<sup>-1</sup>, empirical absorption correction (0.890 ≤ *T* ≤ 0.974), *Z* = 4, triclinic, space group P-1 (No. 2),  $\lambda$  = 0.71073 Å, *T* = 223(2) K,  $\omega$  and  $\varphi$  scans, 29851 reflections collected ( $\pm h, \pm k, \pm l$ ),  $[(\sin\theta)/\lambda]$  = 0.62 Å<sup>-1</sup>, 13167 independent (*R*<sub>int</sub> = 0.047) and 10493 observed reflections [*I* > 2σ(*I*)], 691 refined parameters, *R* = 0.051, *wR*<sup>2</sup> = 0.122, max. (min.) residual electron density 0.53 (-0.42) e.Å<sup>-3</sup>, the hydrogens were calculated and refined as riding atoms.

**X-ray crystal structure analysis of 2 (erk7466):** formula C<sub>50</sub>H<sub>66</sub>N<sub>10</sub>Si<sub>4</sub>Zn<sub>2</sub>, *M* = 1050.23, colorless crystal, 0.23 x 0.2 x 0.15 mm, *a* = 10.3795(3), *b* = 11.2101(4), *c* = 15.3836(6) Å,  $\alpha$  = 75.093(1),  $\beta$  = 80.392(2),  $\gamma$  = 71.743(2)°, *V* = 1635.4(1) Å<sup>3</sup>,  $\rho_{\text{calc}}$  = 1.066 gcm<sup>-3</sup>,  $\mu$  = 0.842 mm<sup>-1</sup>, empirical absorption correction (0.829 ≤ *T* ≤ 0.884), *Z* = 1, triclinic, space group P-1 (No. 2),  $\lambda$  = 0.71073 Å, *T* = 223(2) K,  $\omega$  and  $\varphi$  scans, 12752 reflections collected ( $\pm h, \pm k, \pm l$ ),  $[(\sin\theta)/\lambda]$  = 0.62 Å<sup>-1</sup>, 6468 independent (*R*<sub>int</sub> = 0.042) and 5746 observed reflections [*I* > 2σ(*I*)], 306 refined parameters, *R* = 0.057, *wR*<sup>2</sup> = 0.136, max. (min.) residual electron density 0.46 (-0.47) e.Å<sup>-3</sup>, the hydrogens were calculated and refined as riding atoms.

**X-ray crystal structure analysis of 4 (erk7454):** formula C<sub>61</sub>H<sub>33</sub>B<sub>2</sub>F<sub>30</sub>N<sub>5</sub>Si<sub>2</sub>Zn, *M* = 1549.09, pale yellow, 0.40 x 0.30 x 0.15 mm, *a* = 24.0692(3), *b* = 16.8248(3), *c* = 15.9161(3) Å,  $\beta$  = 93.334(1)°, *V* = 6434.5(2) Å<sup>3</sup>,  $\rho_{\text{calc}}$  = 1.599 gcm<sup>-3</sup>,  $\mu$  = 0.551 mm<sup>-1</sup>, empirical absorption correction (0.809 ≤ *T* ≤ 0.922), *Z* = 4, monoclinic, space group C2/c (No. 15),  $\lambda$  = 0.71073 Å, *T* = 273(2) K,  $\omega$  and  $\varphi$  scans, 21499 reflections collected ( $\pm h, \pm k, \pm l$ ),  $[(\sin\theta)/\lambda]$  = 0.59 Å<sup>-1</sup>, 5538 independent (*R*<sub>int</sub> = 0.050) and 4537 observed reflections



[ $I > 2\sigma(I)$ ], 495 refined parameters,  $R = 0.061$ ,  $wR2 = 0.164$ , max. (min.) residual electron density  $0.35$  ( $-0.25$ )  $e.\text{\AA}^{-3}$ , the hydrogens were calculated and refined as riding atoms.

**X-ray crystal structure analysis of 5 (erk7521):** formula  $C_{60}H_{56}N_6F_{10}Zn_2$ ,  $M = 1181.85$ , pale yellow crystal,  $0.18 \times 0.08 \times 0.06$  mm,  $a = 9.7839(1)$ ,  $b = 28.2012(3)$ ,  $c = 20.4432(3)$   $\text{\AA}$ ,  $\beta = 91.327(1)^\circ$ ,  $V = 5639.1(1)$   $\text{\AA}^3$ ,  $\rho_{\text{calc}} = 1.392$   $\text{gcm}^{-3}$ ,  $\mu = 0.928$   $\text{mm}^{-1}$ , empirical absorption correction ( $0.850 \leq T \leq 0.946$ ),  $Z = 4$ , monoclinic, space group  $P2_1/c$  (No. 14),  $\lambda = 0.71073$   $\text{\AA}$ ,  $T = 223(2)$  K,  $\omega$  and  $\varphi$  scans, 30909 reflections collected ( $\pm h$ ,  $\pm k$ ,  $\pm l$ ),  $[(\sin\theta)/\lambda] = 0.62$   $\text{\AA}^{-1}$ , 11342 independent ( $R_{\text{int}} = 0.054$ ) and 8289 observed reflections [ $I > 2\sigma(I)$ ], 715 refined parameters,  $R = 0.057$ ,  $wR2 = 0.120$ , max. (min.) residual electron density  $0.37$  ( $-0.42$ )  $e.\text{\AA}^{-3}$ , the hydrogens were calculated and refined as riding atoms.

**X-ray crystal structure analysis of 7 (erk7511):** formula  $C_{38}H_{30}N_8Zn$ ,  $M = 664.07$ , yellow crystal,  $0.16 \times 0.07 \times 0.03$  mm,  $a = 9.7928(3)$ ,  $b = 11.3155(4)$ ,  $c = 16.9990(6)$   $\text{\AA}$ ,  $\alpha = 72.961(1)$ ,  $\beta = 83.413(2)$ ,  $\gamma = 68.922(2)^\circ$ ,  $V = 1680.4(1)$   $\text{\AA}^3$ ,  $\rho_{\text{calc}} = 1.312$   $\text{gcm}^{-3}$ ,  $\mu = 0.770$   $\text{mm}^{-1}$ , empirical absorption correction ( $0.886 \leq T \leq 0.977$ ),  $Z = 2$ , triclinic, space group  $P-1$  (No. 2),  $\lambda = 0.71073$   $\text{\AA}$ ,  $T = 223(2)$  K,  $\omega$  and  $\varphi$  scans, 14852 reflections collected ( $\pm h$ ,  $\pm k$ ,  $\pm l$ ),  $[(\sin\theta)/\lambda] = 0.59$   $\text{\AA}^{-1}$ , 5751 independent ( $R_{\text{int}} = 0.045$ ) and 5251 observed reflections [ $I > 2\sigma(I)$ ], 428 refined parameters,  $R = 0.049$ ,  $wR2 = 0.121$ , max. (min.) residual electron density  $0.62$  ( $-0.36$ )  $e.\text{\AA}^{-3}$ , the hydrogens were calculated and refined as riding atoms.

**X-ray crystal structure analysis of 1<sup>a</sup> (erk7487):** formula  $C_{48}H_{58}N_6O_2Zn_2$ ,  $M = 881.74$ , pale yellow crystal,  $0.15 \times 0.12 \times 0.07$  mm,  $a = 9.7845(3)$ ,  $b = 10.2261(4)$ ,  $c = 12.4486(4)$   $\text{\AA}$ ,  $\alpha = 101.950(2)$ ,  $\beta = 104.633(2)$ ,  $\gamma = 104.712(1)^\circ$ ,  $V = 1115.6(7)$   $\text{\AA}^3$ ,  $\rho_{\text{calc}} = 1.312$   $\text{gcm}^{-3}$ ,  $\mu = 1.120$   $\text{mm}^{-1}$ , empirical absorption correction ( $0.850 \leq T \leq 0.925$ ),  $Z = 1$ , triclinic, space group  $P-1$  (No. 2),  $\lambda = 0.71073$   $\text{\AA}$ ,  $T = 223(2)$  K,  $\omega$  and  $\varphi$  scans, 14401 reflections collected ( $\pm h$ ,  $\pm k$ ,  $\pm l$ ),  $[(\sin\theta)/\lambda] = 0.62$   $\text{\AA}^{-1}$ , 4478 independent ( $R_{\text{int}} = 0.037$ ) and 4207 observed reflections [ $I > 2\sigma(I)$ ], 271 refined parameters,  $R = 0.032$ ,  $wR2 = 0.085$ , max. (min.) residual electron density  $0.23$  ( $-0.38$ )  $e.\text{\AA}^{-3}$ , the hydrogen at O1 atom was refined freely, but with O-H distance restraints (DFIX and fixed U-value); others were calculated and refined as riding atoms.

#### 4. $^1\text{H}$ NMR spectra of PLLA formation.

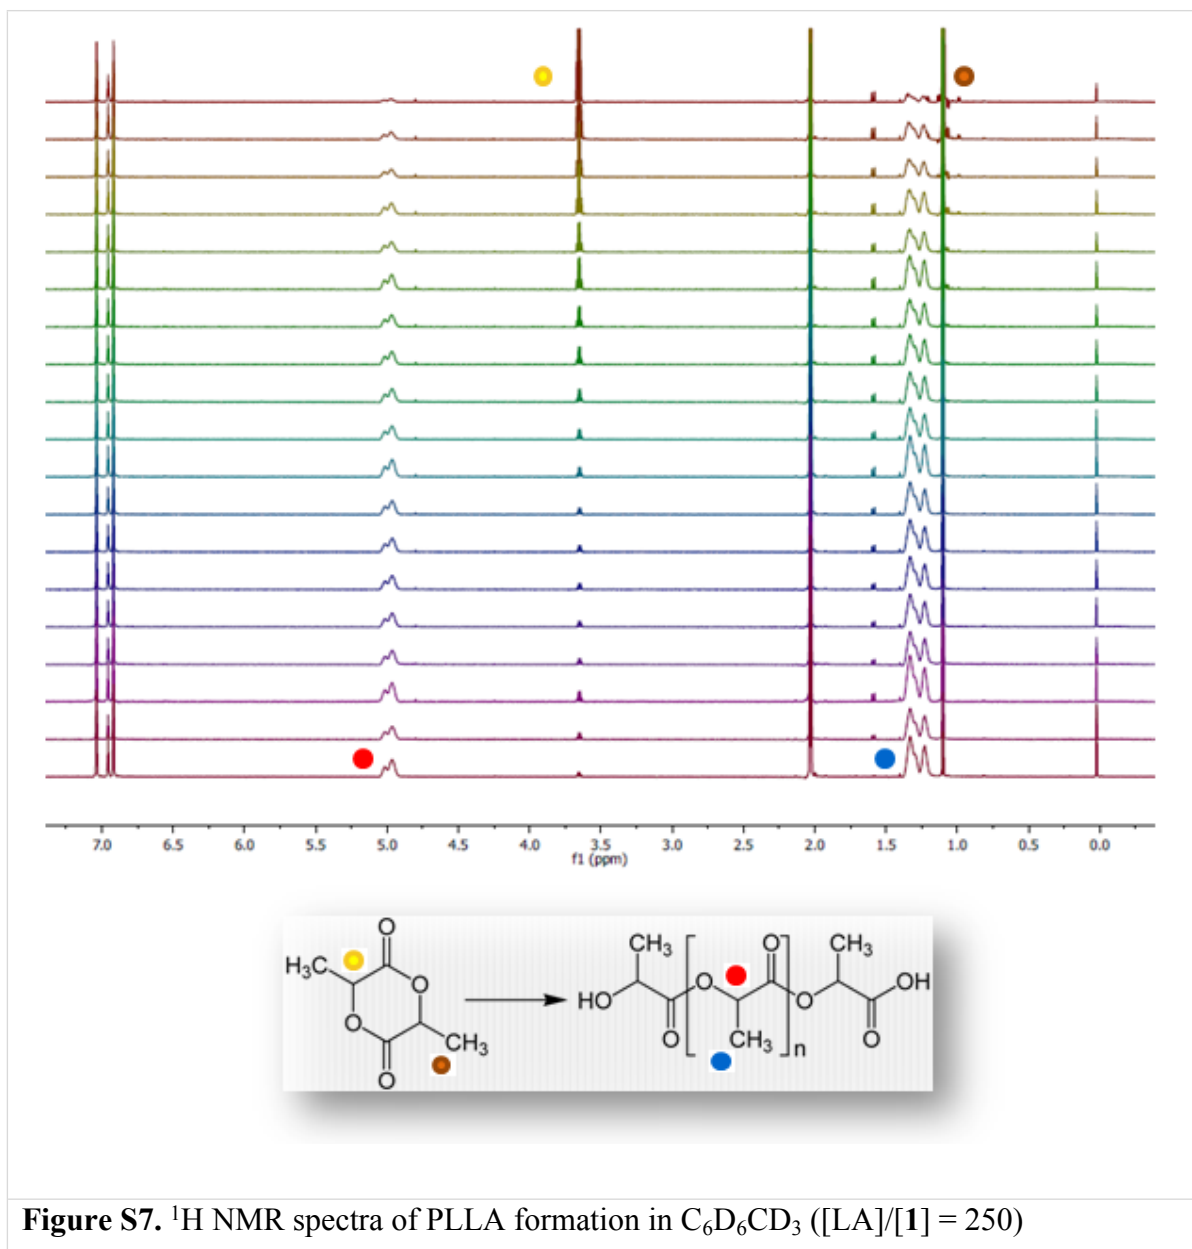

## 5. $^1\text{H}$ NMR spectra of partially dissociated complex 2.

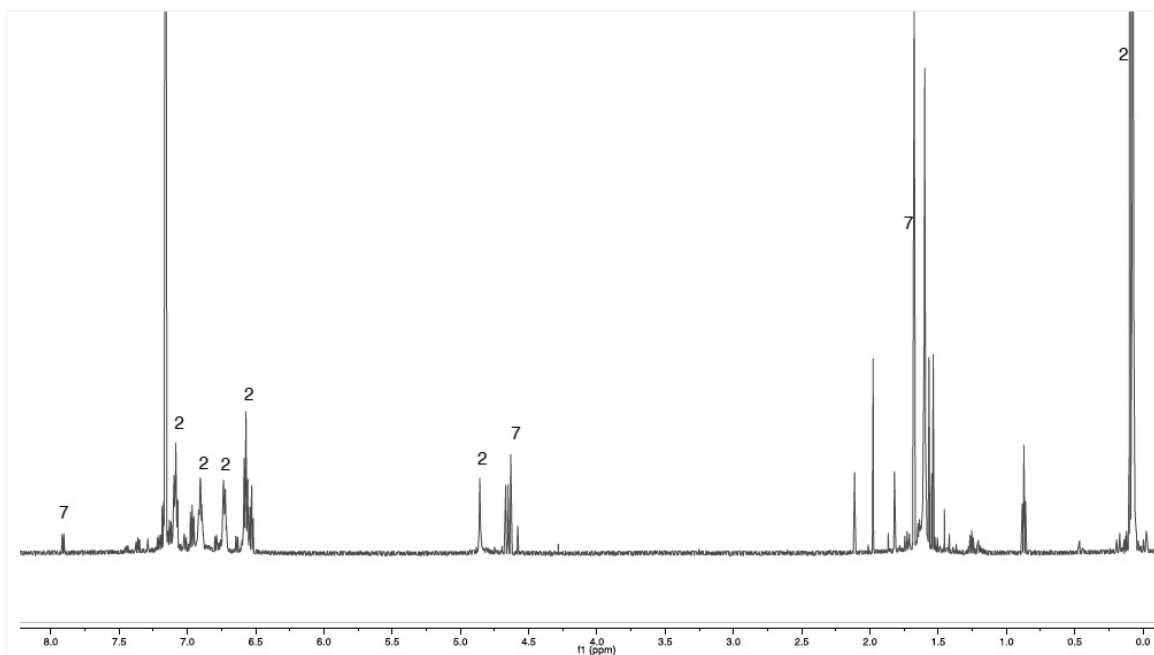

**Figure S8.**  $^1\text{H}$  NMR spectra of partially dissociated complex 2 (see signals of compound 2 and signals of compound 7).

## 6. $^1\text{H}$ NMR spectrum of PLLA

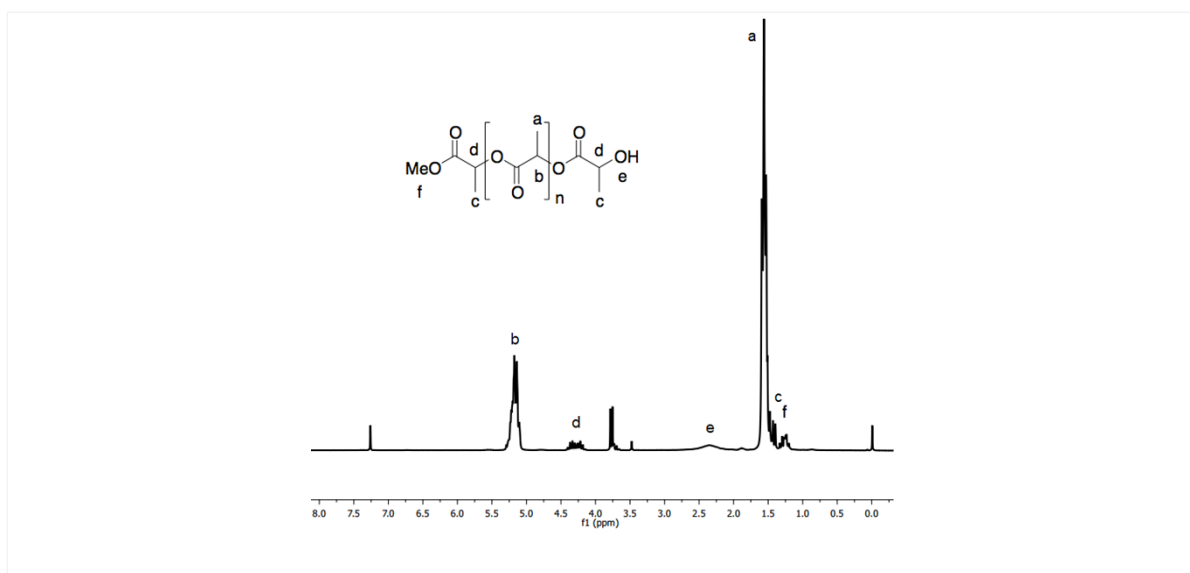

**Figure S9.**  $^1\text{H}$  NMR spectrum (200 MHz,  $\text{CDCl}_3$ ) of the oligomer product obtained from a reaction between L-LA and **1** at room temperature.

### 7. MALDI-TOF spectrum of PLLA

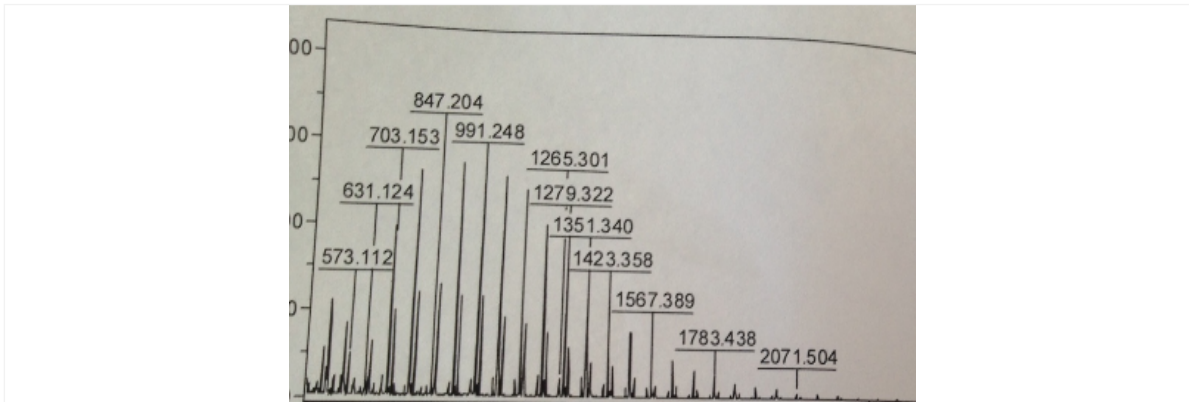

**Figure S10.** MALDI-TOF spectrum of the oligomer product obtained from a reaction between L-LA and **1** at room temperature.

### 8. PLLA SEC characterization

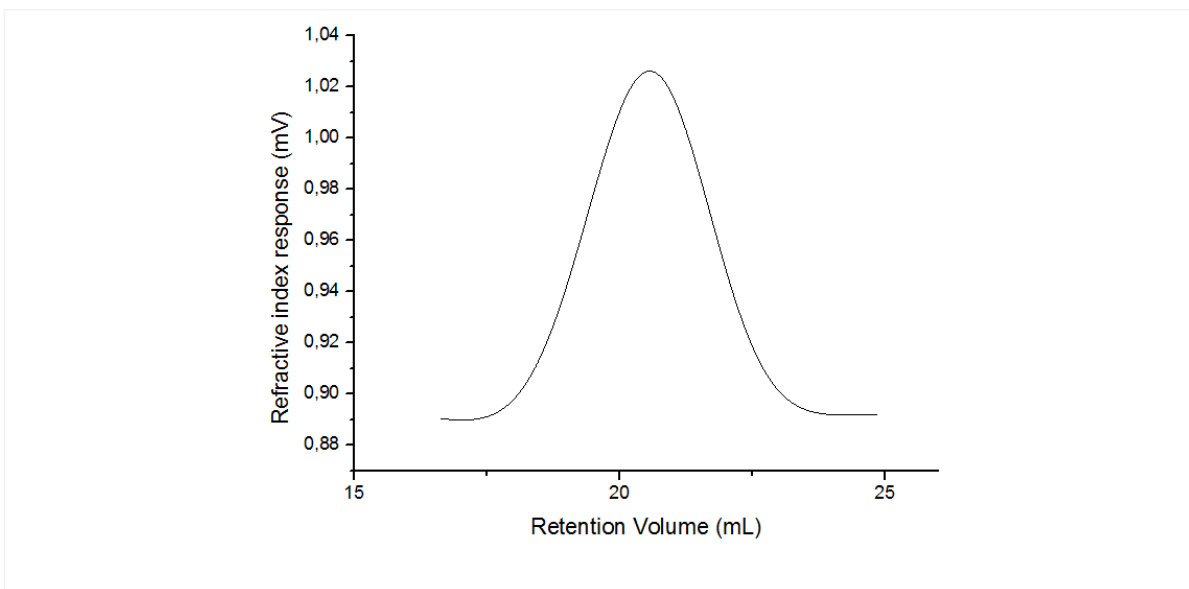

**Figure S11.** GPC traces of polymer produced using **1** at 25 °C. See Entry 1, Table 2 (manuscript).

## References

- 1** (a) S. Schulz, J. Spielmann, D. Blaser and C. Wolper, *Chem. Commun.*, 2011, **47**, 2676-2678; (b) S. S. Al-Juaid, N. H. Buttrus, C. Eaborn, P. B. Hitchcock, A. T. L. Roberts, J. D. Smith and A. C. Sullivan, *Chem. Commun.*, 1986, 908. (c) G. Anantharaman and K. Elango, *Organometallics*, 2007, **26**, 1089.
